# 1 **Western diet increases brain metabolism and adaptive** 2 **immune responses in a mouse model of amyloidosis**

3 Marilena Poxleitner<sup>1</sup>, Sabrina H.L. Hoffmann<sup>1</sup>, Georgy Berezhnoy<sup>1</sup>, Tudor Ionescu<sup>1</sup>, Irene  
4 Gonzalez-Menendez<sup>2,3</sup>, Florian C. Maier<sup>1</sup>, Dominik Seyfried<sup>1</sup>, Walter Ehrlichmann<sup>1</sup>, Leticia  
5 Quintanilla-Martinez<sup>2,3</sup>, Andreas M. Schmid<sup>1,3</sup>, Gerald Reischl<sup>1,3</sup>, Christoph Trautwein<sup>1</sup>,  
6 Andreas Maurer<sup>1,3</sup>, Bernd J. Pichler<sup>1,3</sup>, Kristina Herfert<sup>1\*†</sup>, Nicolas Beziere<sup>1,4\*†</sup>

7 <sup>1</sup> Werner Siemens Imaging Center, Department of Preclinical Imaging and Radiopharmacy, Eberhard  
8 Karls University Tübingen, Tübingen, Germany

9 <sup>2</sup> Department of Pathology and Neuropathology, University Hospital Tübingen, Eberhard Karls  
10 University Tübingen, Germany

11 <sup>3</sup> Cluster of Excellence iFIT (EXC 2180) "Image Guided and Functionally Instructed Tumor Therapies",  
12 Eberhard Karls University Tübingen, Germany

13 <sup>4</sup> Cluster of Excellence CMFI (EXC 2124) "Controlling Microbes to Fight Infections", Eberhard Karls  
14 University Tübingen, Germany

15

16 \* corresponding authors

17 † KH and NB contributed equally.

18

19

20 Keywords: obesity, western diet, Alzheimer's disease, PET imaging, [<sup>18</sup>F]FDG, [<sup>18</sup>F]FTHA,  
21 [<sup>18</sup>F]GE-180, APPPS1, <sup>1</sup>H spectroscopy, metabolomics, flow cytometry.

22

23 **Abstract**

24 Diet-induced body weight gain is a growing health problem worldwide, leading to several  
25 serious systemic diseases such as diabetes. Because it is often accompanied by a low-grade  
26 metabolic inflammation that alters systemic function, dietary changes may also contribute to  
27 the progression of neurodegenerative diseases. Here we demonstrate disrupted glucose and  
28 fatty acid metabolism and a disrupted plasma metabolome in a mouse model of Alzheimer`s  
29 disease following a western diet using a multimodal imaging approach and NMR-based  
30 metabolomics. We did not detect glial-dependent neuroinflammation, however using flow  
31 cytometry we observed T cell recruitment in the brains of western diet-fed mice. Our study  
32 highlights the role of the brain-liver-fat-axis and the adaptive immune system in the disruption  
33 of brain homeostasis due to a Western diet.

34

35

36

## 37 **Introduction**

38 Overweight and obesity are serious health problems with an increasing prevalence  
39 worldwide <sup>1</sup>. In longitudinal studies of overweight and obese individuals, a changing lifestyle,  
40 including less physical activity and poor dietary choices, has shown mid-life obesity and  
41 resulting metabolic disorder alterations, e.g. type 2 diabetes, cardiovascular disease, to be a  
42 risk factor for developing dementia and cognitive decline decades later <sup>2-5</sup>. Numerous  
43 investigations described the systemic alterations through high-caloric diets like western diets  
44 (WDs) <sup>6-8</sup>. In response to obesity and associated chronic oversupply of fatty acids and sugar,  
45 a low-grade chronic inflammation develops, which if persisting over time, leads to a constant  
46 release of inflammatory effectors into the periphery <sup>9-11</sup>. Adipose and hepatic tissues are the  
47 main drivers behind this mechanism, and diet-induced severe fatty liver disease has been  
48 observed in rodent and human subjects <sup>6,7,12-14</sup>. Therefore, advancements in understanding  
49 the implications of diet-induced obesity for the whole body are an important factor in health  
50 research.

51 Research is still expanding on what is known about the relationship between diet  
52 composition, obesity, and the emergence of neurodegenerative disorders and cognitive  
53 decline <sup>15,16</sup>. A current hypothesis is that by the initiation of metabolic and inflammatory  
54 processes, such as the proliferation of macrophages in adipose tissue and the release of  
55 pro-inflammatory cytokines, immunomodulatory cascades are further activated, eventually  
56 leading to neuroinflammation <sup>17-19</sup>. Triggered by a high-caloric diet, several human and  
57 animal studies link the metabolic impact of the diet to the progression of Alzheimer's disease  
58 (AD) inducing increased oligomeric A $\beta$  levels and A $\beta$  plaque load in the rodent brain <sup>18,20-22</sup>.  
59 Even more, dietary cues like fatty acids (FAs) and sugars have been shown to modulate  
60 central metabolism itself probably increasing the susceptibility to dementia <sup>23-27</sup>

61 To date, the molecular mechanisms which connect obesity and AD are not fully understood  
62 <sup>28</sup>. Several ways exist to ensure communication between the CNS and periphery, which allow  
63 the CNS to adapt and respond to peripheral cues <sup>29,30</sup>. In neurodegenerative diseases like

64 Parkinson's disease and AD, emerging evidence indicates that neuroinflammation does not  
65 only rely on glial activation, but innate and adaptive immune cells can modulate inflammatory  
66 processes in the brain as well <sup>31-34</sup>. In human brain samples and animal models of AD,  
67 immunohistochemical experiments revealed substantial involvement of peripheral innate and  
68 adaptive immune system components in the pathogenesis. For example in multiple sclerosis  
69 mouse models, self-antigen recognizing T cells have been identified in brains to act as  
70 primary drivers of the autoimmune response <sup>35,36</sup>. Furthermore, infiltration of bone marrow-  
71 derived monocytes into CNS was triggered by a high-fat diet <sup>37</sup>. Study results on the impact  
72 of peripheral immune cells on AD pathology are however still not in agreement <sup>38-42</sup>.

73 In this study, we show through a multimodal and multiparametric approach that the  
74 consumption of a palatable, high-caloric WD during early to mid-life can cause several  
75 systemic effects affecting the peripheral and central metabolism. Using the APPPS1 mouse  
76 model, a mouse model of early accelerated amyloidosis <sup>43</sup>, we identified changes in brain  
77 metabolism after disease development using different PET tracers and employed MR  
78 spectroscopy and metabolomics to investigate systemic alterations. We first investigated  
79 changes of cerebral glucose metabolism, using [<sup>18</sup>F]fluorodeoxyglucose ([<sup>18</sup>F]FDG), a well-  
80 established PET marker, widely used to investigate cerebral abnormalities. Second, the diet-  
81 induced changes of fatty acid metabolism were analyzed using the long-chain fatty acid  
82 surrogate 14(R,S)-[<sup>18</sup>F]fluoro-6-thia-heptadecanoic acid ([<sup>18</sup>F]FTHA). Third, to assess diet-  
83 induced neuroinflammatory changes in the brain we used the translocator protein (TSPO)  
84 tracer [<sup>18</sup>F]GE-180, which is a surrogate marker for neuroinflammation found mainly on  
85 activated glia cells after neuronal damage and inflammation <sup>44-46</sup>. In addition, we performed  
86 flow cytometric and metabolic analyses *ex vivo* to investigate the metaflammation profile of  
87 the animals in-depth during WD feeding. With PET, we obtained complementary results  
88 showing that diet-induced obesity (DIO) and AD had altered brain glucose and fatty acid  
89 metabolism, which are independent of the A $\beta$  pathology and microglial activation. Moreover,  
90 we identified T cells as an additive factor in the interplay of AD pathology and  
91 metaflammation. The imbalance of key plasma metabolites and liver lipids in the periphery,

92 along with the disruption of glucose and fatty acid metabolism in the brain, underscores the  
93 importance of a healthy lifestyle and provides further insight into the complex interplay of the  
94 brain-liver-fat-axis.

95

## 96 **Methods**

### 97 *Animals*

98 This study was performed in double transgenic APPPS1-21 mice (B6.Cg-Tg(Thy1-  
99 APPSw,Thy1-PSEN1\*L166P)21Jckr; APPPS1, n = 21) that co-expressed the human  
100 Swedish double mutation APP KM670/671NL and the L166P mutated human PS1 under the  
101 control of neuron-specific Thy-1 promotor. This model shows accelerated amyloid deposition  
102 at six weeks of age, accompanied in further age by microglial activation<sup>43</sup>. As controls, wild-  
103 type C57BL/6J mice (WT, n = 23) were used. In transgenic and wild-type groups, male and  
104 female mice were investigated. ND and WD group littermates were housed in genotype  
105 mixed groups in individually ventilated cages with food and water ad libitum in a 12-hour  
106 light/dark cycle. All procedures were performed in accordance with German federal  
107 regulations on the use and care of experimental animals and approved by the local  
108 authorities (Regierungspräsidium Tübingen (R06/21 G)).

### 109 *Diet and study design*

110 At the age of  $2.1 \pm 0.1$  months, animals were either fed a western diet (WD, E15721-347,  
111 ssniff, Soest, Germany) or a normal rodent diet (ND, V1534-000, ssniff, Soest, Germany) for  
112 a total of 24 weeks (Fig. 1a). Compared to the normal rodent diet, the western diet contains  
113 higher percentages of fat, sugar and protein which was accompanied by a shifted balance of  
114 fatty acids, minerals and trace elements (Suppl. Table 1). To ensure stability of the dietary  
115 constituents, WD was entirely replaced once per week. For ND-fed animals, weight was  
116 registered starting at  $2.9 \pm 0.5$  months (n = 20; APPPS1 = 9 and WT = 11), whereas for WD-  
117 fed animals, registration started at  $2.1 \pm 0.1$  months (n = 24, APPPS1 = 12 and WT = 12) .  
118 The weighting of animals was conducted weekly. At  $7.7 \pm 0.4$  months, the animals underwent  
119 *in vivo* PET and MR imaging over a period of 4 weeks and were sacrificed for further flow  
120 cytometric, metabolic, and histologic analyses (Fig. 1a). Notably *in vivo* and *ex vivo* results  
121 include individual drop outs of experimental animals due to e.g., technical problems during

122 procedure and/or analyses. In all experiments, mice were randomized and underwent  
123 imaging and *ex vivo* experiments in mixed groups of wild-types and transgenics as well as  
124 gender.

### 125 *Radiotracer synthesis*

126 Briefly, using the  $^{18}\text{O}(p,n)^{18}\text{F}$  nuclear reaction fluorine-18 was produced as [ $^{18}\text{F}$ ]fluoride by  
127 proton irradiation of [ $^{18}\text{O}$ ]H<sub>2</sub>O (Rotem, Leipzig, Germany) at the Tübingen PETtrace cyclotron  
128 (GE Healthcare, Uppsala, Sweden).

129 [ $^{18}\text{F}$ ]FDG was synthesized in a TRACERlab MX<sub>FDG</sub> synthesizer (GE Healthcare, Liège,  
130 Belgium) as described previously, using mannose triflate (ABX, Radeberg, Germany) as a  
131 precursor<sup>47</sup>. Quality control was performed according to Ph. Eur. guidelines. Particularly,  
132 radiochemical purity, as determined by thin-layer chromatography (TLC), was >95%. Molar  
133 radioactivities were > 50 GBq/μmol at the end of synthesis.

134 [ $^{18}\text{F}$ ]FTHA was synthesized using the method from DeGrado<sup>48</sup> with modifications on a  
135 modified TRACERlab FX<sub>F-N</sub> synthesizer (GE Healthcare, Münster, Germany). Briefly, 2 μL of  
136 the precursor benzyl-14-(R,S)-tosyloxy-6-thiaheptadecanoate (ABX, Germany) in 1 mL of  
137 acetonitrile were reacted with a mixture of aseptically dried [ $^{18}\text{F}$ ]fluoride, 15 mg of  
138 Kryptofix 2.2.2. and 3.5 mg K<sub>2</sub>CO<sub>3</sub> at 110°C for 5 min. After hydrolysis with 350 μL of 0.14 N  
139 KOH (110 °C, 5 min) 0.3 mL of 6.5 % sulfuric acid was added for neutralization. The product  
140 was purified using HPLC (Supelcosil ABZ+; 10 x 250 mm; H<sub>2</sub>O/MeOH 80/20 with 1 % H<sub>3</sub>PO<sub>4</sub>;  
141 5 ml/min; detection: UV 216 nm and NaI(Tl)). The product was obtained in uncorrected yields  
142 of 15 ± 5 % (n = 13), corresponding to 9.3 ± 3.3 GBq of isolated [ $^{18}\text{F}$ ]FTHA, after irradiations  
143 using 35 to 60 μA for 40 to 60 min. Radiochemical purity as determined by TLC was > 90 %.  
144 Specific activities were > 50 GBq/μmol at the end of synthesis.

145 [ $^{18}\text{F}$ ]GE-180 was synthesized according to Wickstrøm et al.<sup>49</sup> using a FASTlab synthesizer  
146 with single-use disposable cassettes (GE Healthcare, Germany) according to manufacturer's

147 instructions. Quality control was performed via HPLC, yielding the product in chemical purity  
148 of > 90% and high molar radioactivity of > 600 GBq/ $\mu$ mol at the end of the synthesis.

#### 149 *PET imaging*

150 PET studies were performed in C57BL/6J and APPPS1 littermates of each group (ND and  
151 WD) over a period of 4 weeks. Animals were anesthetized by using isoflurane (carrier gas  
152 100% oxygen at 1L/min, 5 % for induction, 1.2-1.5 % maintenance) and body temperature  
153 was maintained at 37 °C throughout the studies using mouse beds with temperature  
154 feedback control (Medres, Cologne, Germany and Jomatik, Tuebingen, Germany). All PET  
155 scans were performed using a Inveon dedicated small-animal microPET scanner (Siemens  
156 Healthcare, Knoxville (TN), USA), and scans were acquired dynamically for 60 min,  
157 immediately followed by a 14 min  $^{57}\text{Co}$  transmission scan as well as correction of dead time,  
158 random and scatter events. Mice were positioned in the center of the field of view and  
159 injected intravenously (*i.v.*) into a lateral tail vein with  $12.0 \pm 0.3$  MBq [ $^{18}\text{F}$ ]FDG (WT-ND n =  
160 10 ; APPPS1-ND n = 7 ; WT-WD n = 7 ; APPPS1-WD n = 8),  $14.4 \pm 2.3$  MBq [ $^{18}\text{F}$ ]FTHA  
161 (WT-ND n = 8 ; APPPS1-ND n = 8 ; WT-WD n = 8 ; APPPS1-WD n = 7) and  $13.5 \pm 2.5$  MBq  
162 [ $^{18}\text{F}$ ]GE-180 (WT-ND n = 8 ; APPPS1-ND n = 7 ; WT-WD n = 9 ; APPPS1-WD n = 10) on  
163 consecutive days with at least one day of recovery. The mice recovered after each scan on a  
164 heating pad in an empty cage, and their health was monitored by the researcher.

#### 165 *PET image reconstruction and data analysis*

166 List-mode data for all scans were histogrammed in 23 frames (8x30 s, 6x60 s, 7x300 s, and 2x  
167 450 s) and reconstructed with two-dimensional ordered subsets expectation maximization  
168 (OSEM2D) algorithm with an image zoom of 2 and a 256x256 matrix using Inveon  
169 Acquisition Workplace (Siemens Healthcare, USA). Volume-of-interest (VOI) and voxel-wise  
170 analyses were performed on reconstructed images using PMOD software v3.2 (PMOD  
171 Technologies, Zürich, Switzerland) and statistical parametric mapping SPM 12 (Wellcome  
172 Trust Center for Neuroimaging, University College London, United Kingdom). Individual PET  
173 images were co-registered to a predefined mouse brain template Mouse-Mirrione-T2 (



174 PMOD technologies), and a whole-brain VOI as well as a brain-region specific atlas<sup>50,51</sup> were  
175 applied. The anterior prefrontal cortex area was removed from the cortex VOI to avoid spill-  
176 over effects from the harderian glands. The following brain areas were analyzed: cortex  
177 (CTX), hippocampus (HIP), cerebellum (CB), and hypothalamus (HYP). Time activity curves  
178 (TACS) were extracted and standardized uptake values (SUVs) for each animal were  
179 calculated. For comparison of uptake in all four groups, the mean SUV was evaluated  
180 between 30- and 60-min post injection (*p.i.*). To determine statistical significance one-way  
181 ANOVA using multiple comparisons with post hoc Tukey correction was performed using  
182 GraphPad Prism 9.0.1 (GraphPad Software LLC, San Diego, USA).

183 For voxel-wise analysis, PET images were automatically overlaid to Mouse-Mirrione-T2 atlas  
184 as reference (PMOD technologies). Differences between groups for each PET tracer were  
185 identified using a general linear model (GLM) available in SPM 12. After estimating GLM,  
186 statistical parameter maps were generated by interrogating the outcome using contrast  
187 vectors. A one-way ANOVA without post hoc correction was applied. Contrasts were  
188 compared between groups using no further masking or determined voxel clusters. The  
189 significance threshold was set for the tracers individually. Images were prepared using  
190 dedicated software (MRICron,<sup>52</sup>).

#### 191 *<sup>1</sup>H Magnetic resonance spectroscopy of the liver*

192 For magnetic resonance spectroscopy (MRS) on a 7 T BioSpec 70/30 MR scanner (Bruker  
193 BioSpin GmbH, Ettlingen, Germany) equipped with a gradient insert, animals were  
194 anesthetized using isoflurane (carrier gas oxygen 100% at 1 L/min, 5% for induction, 1.2-  
195 1.5% maintenance). Animal body temperature was maintained by placing mice on an MR-  
196 compatible water-warmed mouse bed (Jomatik, Tuebingen, Germany). During the whole  
197 acquisition, breathing was monitored using a specialized MR breathing pad. Mice were  
198 positioned in the center of a <sup>1</sup>H volume coil with an inner diameter of 86 mm. For correct  
199 positioning of liver voxel, an anatomical T2-weighted TurboRARE protocol (TR= 800 ms; TE  
200 = 37.63 ms; FOV = 74x32x18; image size = 296x128x72) was acquired. Next, B<sub>0</sub> map (TR =

201 30 ms; FOV = 60x60x60 mm<sup>3</sup>, Averages = 1) was acquired. After placing the voxel (3x3x3  
202 mm<sup>3</sup>), avoiding major hepatic blood vessels, the localized shim was acquired resulting in  
203 mean shim values of 52.4 ± 13.3 Hz. For spectral acquisition, a stimulated echo acquisition  
204 mode (STEAM; TR = 1500 ms; TE = 3 ms; averages = 512) with and without water  
205 suppression (VAPOR) was used. All sequences were acquired using Paravision software  
206 v6.0.1 (Bruker, Ettlingen, Germany).

207 Spectral analysis was performed using LC Model analysis software v6.3-1L, (Stephen  
208 Provencher, Oakville, ON, Canada; 64). Subsequently, lipid peaks were evaluated  
209 according to Ye et al. 2012<sup>54</sup>, and the following lipids were extracted: Lip09, Lip13, Lip16,  
210 Lip21, Lip23, Lip28, Lip41, Lip43, Lip52, and Lip53. Lipids with a standard deviation (SD) >  
211 20 were excluded<sup>55</sup>; thus, animal numbers differ between lipids (Suppl. Table 2). Liver fat  
212 composition, including lipid mass (LM); fractional lipid mass (fLM), saturated lipid  
213 component (SL), fraction of unsaturated lipids (fUL), fraction of saturated lipids (fSL),  
214 fraction of polyunsaturated lipid (fPUL), fraction of monounsaturated lipids (fMUL), and  
215 mean chain length (MCL) was calculated as described previously<sup>54</sup>. For LM and fLM lipid  
216 peaks Lip13+Lip16 and Lip21+Lip23+Lip28 were united to reduce SD below 20 and hence  
217 include all animals into the calculation. Mean values were statistically analyzed using  
218 multiple unpaired t-test with post hoc multiple comparison correction using Holm-Sidak  
219 method (p value threshold set to  $\alpha = 0.05$ ) in GraphPad Prism 9.0.1 (GraphPad Software  
220 LLC).

### 221 *Ex vivo experiments*

222 Following the completion of *in vivo* measurements, the mice were anesthetized by using  
223 isoflurane (carrier gas oxygen), and blood was retro-orbitally taken. Then, the mice were  
224 sacrificed through asphyxiation with CO<sub>2</sub> and perfused through the left ventricle with 20 mL of  
225 cold PBS, and brain and white adipose tissue (WAT) were removed for *ex vivo* analysis.

## 226 *Flow cytometry*

227 Immune cell isolation was performed as described in Hoffmann et al. 2019<sup>56</sup>. Briefly, brains  
228 and WAT of the abdominal cavity were isolated and chopped into small pieces. Tissue was  
229 digested for 45 min in 1 mg/mL Collagenase IV (Sigma Aldrich, St. Louis, Missouri, USA) in  
230 DMEM supplemented with 5% FCS and 10 mM HEPES at 37 °C. Then, digested tissue was  
231 washed through a 70 µm mesh cell strainer with 1% FCS in PBS. Brain homogenates were  
232 resuspended in 70% percoll (in PBS; GE Healthcare, CA, Illinois, USA) layered under 37%  
233 percoll solution topped by a 30% percoll solution in a 15 mL Falcon tube and immediately  
234 centrifuged 30 min (acceleration of 2 and deceleration of 1). The immune cells, located  
235 between percoll layers 70% and 37% after centrifugation, were isolated and centrifuged for  
236 5 min. The remaining erythrocytes were lysed with 3 mL ACK lysing buffer (Lonza, Basel,  
237 Switzerland) for 5 min at room temperature. Following washing, the cell suspension was  
238 then pipetted into a 5 mL polystyrene tube via a 40 µm cell strainer snap cap (Corning Inc.,  
239 Corning, New York, USA). Afterwards, isolated cells from WAT were counted using cell  
240 counting chambers (one-way Neubauer counting chambers, C-Chip, Merck, Darmstadt,  
241 Germany). Single-cell suspensions were first stained with viability stain (Zombie NIR fixable  
242 viability kit, BioLegend, San Diego, California, USA) followed by either BV510-αCD45  
243 (clone: 30-F11), AF700-αB220 (clone: RA3-6B2), BV605-αCD11b (clone: M1/70), BV711-  
244 αLy6G (clone: 1A8), BV785-αCD11c (clone: N418), PE/Cy7-αI-A/I-E (clone: M5/114.15.2)  
245 and PE-αF4/80 (clone: BM8) or with PE-αCD45.2 (clone 104), FITC-αCD3 (clone 500A2),  
246 AF700-αCD8 (clone 53-6.7), BV521-αCD25 (clone PC61), BV510-αCD44 (clone IM7),  
247 PE/Cy7-αCD62L (clone MEL-14), BV650-αCD69 (clone H1.2F3), BV785-αCD127 (clone  
248 A7R34), BV711-αPD-1 (clone 29F.1A12). All antibodies were purchased from BioLegend  
249 (San Diego, CA, USA). The staining took 30 min at 4°C, and cells were afterwards washed  
250 three times with PBS, fixed in 0.5% formalin, and analyzed on the BD LSRFortessa flow  
251 cytometer (BD Biosciences, Franklin Lakes, New Jersey, USA). Analysis was performed  
252 with FlowJo software v10.0.7 (BD Biosciences, USA), and statistical significance was  
253 determined using one-way ANOVA corrected for multiple comparisons with post hoc Tukey

254 correction via GraphPad Prism 9.0.1 (GraphPad Software LLC). Gating strategy for both  
255 antibody panels are shown in Suppl. Fig 1 and 2. Animal numbers for the organs were for  
256 brain (WT-ND n = 11; APPPS1-ND n = 8, WT-WD n = 10, APPPS1-WD n= 9) and for WAT  
257 (WT-ND n = 11, APPPS1-ND n = 8, WT-WD n = 10, APPPS1-WD n= 7).

## 258 *Metabolomics*

259 For plasma metabolome analysis, blood was collected in an EDTA tube and centrifuged at 4  
260 °C to separate the blood plasma, and aliquots were quenched and snap-frozen with liquid  
261 N<sub>2</sub>. A two-phase extraction protocol (polar and lipophilic phases) was applied according to  
262 Eggers & Schwudke<sup>57</sup>. In brief: Blood plasma was transferred to 2 mL AFA glass tubes  
263 (Covaris Inc, Woburn, Massachusetts, USA) and mixed with ultra-pure water, tert-butyl  
264 methyl ether (MTBE, CAS: 1634-04-4, Sigma-Aldrich Chemie, Taufkirchen, Germany) and  
265 methanol. Plasma metabolites were extracted using focused ultrasonication (Covaris Inc,  
266 USA) applying the following setup: two treatment cycles, 1<sup>st</sup>: 30 s, Peak Power 125.0, Duty  
267 Factor 32.0, Cycles/Burst 400, Avg. Power 40.0. 2<sup>nd</sup>: 30 s, Peak Power 100.0, Duty Factor  
268 30.0, Cycles/Burst 800, Avg. Power 30.0. Temperature range 5.0 to 15.0 °C. Each cycle  
269 repeated five times per sample, the total run time per sample was 5 min. Afterwards, the  
270 mixture was centrifuged for 5 min, then the polar (water and methanol) phase was  
271 decanted. Resulted solution was evaporated to dryness in three hours with a vacuum  
272 concentrator (SpeedVac: Preset 2, Thermo Fischer Scientific Inc., Waltham,  
273 Massachusetts, USA). Dried pellets of the polar metabolites were resuspended in  
274 deuterated phosphate buffer (75 mM Na<sub>2</sub>HPO<sub>4</sub>, 4% NaN<sub>3</sub>, pH = 7.40) with internal standard  
275 3-(trimethylsilyl) propionic-2,2,3,3-d<sub>4</sub> acid sodium salt (TSP, CAS: 24493-21-8). For  
276 maximum dissolution, the Eppendorf cups containing solutions were sonicated and then  
277 centrifuged for 5 min aiming to remove any solid residue. The supernatant was transferred  
278 into 1.7 mm NMR tubes, then centrifuged for 30 s and subsequently placed in a 96-well  
279 rack. Samples were kept cooled (6° C) in the NMR automatic sample handling robot unit -  
280 SampleJet (Bruker BioSpin, Karlsruhe, Germany) until the measurement. NMR spectra

281 were recorded by a 14.10 Tesla (600 MHz for proton channel) ultra-shielded NMR  
282 spectrometer Avance III HD (Bruker BioSpin, Karlsruhe, Germany) with installed 1.7 mm  
283 TXI triple resonance microprobe. NMR measurement routine was performed via a 1D  
284 CPMG (Carr-Purcell-Meiboom-Gill) experiment in order to suppress residual background  
285 signals from remaining macromolecules like peptides (time domain = 64k points, sweep  
286 width = 20 ppm, 512 scans, 1 hour long, temperature 298 K). The recorded free induction  
287 decays (FIDs) were Fourier-transformed (FT), and spectra were phase and baseline  
288 corrected.

289 Bruker TopSpin 3.6.1 software was used for spectra acquisition and processing (offset  
290 correction, baseline, and phase correction). ChenomX NMR Suite 8.5 Professional  
291 (Chenomx Inc., Edmonton, Canada) was used for metabolite annotation and concentration  
292 calculation, additionally, internal ChenomX library was included for a resonance frequency  
293 of 600 MHz. MetaboAnalyst 5.0 web server (R-based online analysis tool,  
294 [www.metaboanalyst.ca](http://www.metaboanalyst.ca)) was used for metabolite statistical analysis<sup>58</sup>. Missing values were  
295 replaced by a small value (20% of the minimum positive value in the original data). The data  
296 was normalized by a reference sample using probabilistic quotient normalization (PQN)<sup>59</sup>  
297 and scaled using Pareto scaling (mean-centered and divided by the square root of the  
298 standard deviation of each variable). Data were analyzed using statistical approaches: one-  
299 way ANOVA (analysis of variance), partial least squares discriminant analysis (PLS-DA),  
300 and t-testing. Box plot graphical design was performed in GraphPad Prism 9.0.1 (GraphPad  
301 Software LLC).

### 302 *Histology*

303 Brains were fixed in 4% formalin and paraffin-embedded. For histology, 3-5  $\mu$ m sections  
304 were cut and stained with hematoxylin and eosin (H&E). Immunohistochemistry was  
305 performed on an automated immunostainer (Ventana Medical Systems, Inc., Oro Valley,  
306 Arizona, USA) according to the company's protocols for open procedures with slight  
307 modifications. The slides were stained with the antibodies CD3 (Clone SP7, DCS Innovative

308 Diagnostik-Systeme GmbH u. Co. KG, Hamburg, Germany), B220 (Clone RA3-6B2, BD  
309 Biosciences, Becton, Dickinson and Company, Franklin Lakes, New Jersey, USA), Iba1  
310 (Abcam, Cambridge, UK) and beta-amyloid (Clone Abeta 42, Synaptic Systems, Goettingen,  
311 Germany). Appropriate positive and negative controls were used to confirm the adequacy of  
312 the staining. All samples were scanned with the Ventana DP200 (Roche, Basel, Switzerland)  
313 and processed with the Image Viewer MFC Application. 200x snapshots were taken in all  
314 samples in the cortex, hippocampus, thalamus, choroid plexus, and hypothalamus. The  
315 number of  $\beta$ -amyloid plaques and the number of B220, CD3, and Iba1 positive cells were  
316 determined in those snapshots. Final image preparation was performed with Adobe  
317 Photoshop CS6 (final n number: WT-ND n = 2; APPPS1-ND n = 3; WT-WD n = 3; APPPS1-  
318 WD n =3).

319

320

## 321 **Results**

### 322 *Body weight*

323 To assess the effect of long-term consumption of a WD, WT and APPPS1, animals were fed  
324 either ND or a WD starting at the age of 2 months over 24 weeks (Fig. 1a). *In vivo* imaging  
325 took place over four weeks and was complemented via flow cytometry, histology and  
326 metabolomic experiments (Fig. 1a). Weight monitoring showed a significantly faster weight  
327 gain in WD-fed mice compared to ND-fed animals over time (Fig. 1b with a 2.5-fold higher  
328 mean weight gain in the WD group (start to end:  $8.7 \pm 3.8$  g) compared to the ND group (start  
329 to end:  $3.3 \pm 1.4$  g). Mean weight gain between males and females did not differ (Fig. 1c).

330

### 331 *Liver fat composition and metabolomics*

332 By using  $^1\text{H}$ - magnetic resonance spectroscopy (MRS), we next aimed to assess liver fat  
333 composition non-invasively.  $^1\text{H}$  MRS analyses revealed higher lipid fractions with different  
334 chain lengths in WD-fed animals (Fig 2a, Suppl. Table 2). We observed a 10-fold higher  
335 calculated lipid mass (ND:  $0.36 \pm 0.15$ ; WD:  $3.35 \pm 2.00$ ) and fractional lipid mass (ND:  $0.48$   
336  $\pm 0.19$ ; WD:  $0.88 \pm 0.09$ ) in WD-treated mice (Fig. 2b, Suppl. Table 2). Interestingly, among  
337 the unsaturated lipid components, only the calculated fraction of polyunsaturated lipids  
338 (fPUL) was significantly smaller in WD livers (ND:  $0.29 \pm 0.10$ ; WD:  $0.12 \pm 0.10$ ), whereas the  
339 saturated lipids (SL and fSL) did not differ between both diets (Suppl. Table 2). Thus, WD  
340 leads to a higher accumulation of hepatic lipids. Overall, MR images indicated higher body  
341 fat accumulation including abdominal and subcutaneous fat (Fig 2c).

342 Plasma metabolite profiles were examined by NMR metabolomics. In total, 24 serum  
343 metabolites from various metabolite classes, such as amino acids, ketone body – 3-  
344 hydroxybutyrate (3-HB), energy metabolites, and short-chain fatty acids were identified. We  
345 observed a substantial change for pyruvate in APPPS1-WD animals (Fig 2d;  $p_{\text{ANOVA}} = 8.13\text{E-}$   
346  $07$ ; VIP score = 1.4), whereas between the other groups a similar abundance level was  
347 detected. All groups, aside from the ND-WT group, developed significantly higher amounts of

348 3-HB ( $p_{ANOVA} = 0.00083$ ) and isoleucine (Suppl. Table 3 group A-C;  $p_{ANOVA} = 0.0016$ ). On  
349 the other side, histidine was drastically lowered in the plasma of the APPPS1-WD group  
350 (Suppl. Table 3 group C, VIP score = 0.8;  $p_{ANOVA} = 0.0012$ ). Moreover, considerable  
351 changes were identified for glucose (Suppl. Table 3 group B, VIP score = 4.5). Consistently  
352 with the higher accumulation of liver fat, animals showed a peripheral misbalance caused by  
353 overnutrition. Regression model analysis identified more changes within transgenic and wild-  
354 type mice group comparison (Suppl. Table 3 groups A, C). Here, we found lower levels of  
355 citrate and succinate – important TCA cycle metabolites, the amino acids phenylalanine and  
356 tyrosine, and creatine in transgenic animals.

### 357 *Cerebral glucose metabolism*

358 To examine changes in cerebral glucose metabolism, we used [ $^{18}\text{F}$ ]FDG-PET. Mean blood  
359 glucose values were measured before the imaging and did not differ between groups (Suppl.  
360 Fig. 3). Representative images of axially positioned brains of each group showed higher  
361 [ $^{18}\text{F}$ ]FDG uptake in the APPPS1-WD group. In contrast, no changes between the other  
362 groups were observed visually (Fig. 3a). Mean SUV of [ $^{18}\text{F}$ ]FDG in the whole-brain displayed  
363 significantly higher values in WD-fed APPPS1 mice compared to the other conditions (Fig.  
364 3b). No significant differences in [ $^{18}\text{F}$ ]FDG SUV between the other groups could be seen.  
365 Further region-based quantification highlighted similar differences between the APPPS1-WD  
366 group and the other groups, underlining an overall brain effect. Voxel-wise analysis  
367 confirmed a whole-brain effect in the APPPS1-WD group (Fig. 3c). A minor difference in  
368 [ $^{18}\text{F}$ ]FDG accumulation between WT-ND and WT-WD could be seen in anterior areas, which  
369 could not be identified in the prior quantification procedure, indicating a minor effect of WD  
370 on [ $^{18}\text{F}$ ]FDG in the anterior region of healthy brains. Together with the VOI-based results,  
371 [ $^{18}\text{F}$ ]FDG revealed hyper glycometabolism in the WD-fed amyloid mouse model.

### 372 *Cerebral fatty acid metabolism*

373 Next, we investigated the impact of western diet on fatty acid metabolism *in vivo* using the  
374 long-chain fatty acid analog [ $^{18}\text{F}$ ]FTHA. Axial brain images representing [ $^{18}\text{F}$ ]FTHA uptake in  
16



375 all groups displayed a higher brain uptake in WD-fed groups (Fig. 4a). VOI-based whole-  
376 brain mean SUVs confirmed a significantly higher [ $^{18}\text{F}$ ]FTHA uptake in WD-fed animals, both  
377 in WT and APPPS1 animals with no differences between genotypes (Fig. 4b). Segmentation  
378 of the brain regions could not highlight any region-specific statistical difference in [ $^{18}\text{F}$ ]FTHA  
379 accumulation, suggesting a whole-brain effect. Overall, the higher uptake of [ $^{18}\text{F}$ ]FTHA in  
380 WD-fed mice was independent of the genotype in all observed brain regions. Further data  
381 analysis on voxel level showed higher signals in WD-fed animals over ND-fed animals in all  
382 observed regions in the brain but did not support identification of more prominent areas  
383 (Fig.4c).

#### 384 *Neuroinflammation*

385 Next, we aimed to investigate the influence of WD on microglia activation in WT and  
386 APPPS1 mice using the TSPO-PET tracer [ $^{18}\text{F}$ ]GE-180. Whole-brain SUV analysis showed  
387 that [ $^{18}\text{F}$ ]GE-180 accumulation was significantly elevated in APPPS1 brains, irrespective of  
388 the diet (Fig. 5a), pointing to a genotype-dependent effect. Further region-specific analysis  
389 pointed at significant radiotracer accumulation differences in the CTX and HIP, regions  
390 typically the most affected by amyloidosis (Fig. 5b). Tracer uptake over time revealed a  
391 higher injection peak in transgenic animals compared to wild-type animals for cortex,  
392 whereas for cerebellum peaks did not differ (Suppl. Fig. 4). Ratios between cortex and  
393 cerebellum as well as hippocampus and cerebellum showed significantly higher values in  
394 APPPS1 brains than in WT (Suppl. Fig. 5). However, no differences between diets were  
395 observed. Further voxel-wise comparison highlighted the main [ $^{18}\text{F}$ ]GE-180 accumulation  
396 differences between WT and APPPS1 brains to be located in CTX and HIP primarily (Fig.  
397 5c).

#### 398 *Immune cell presence in the brain*

399 In order to uncover the potential immune changes underlying the brain metabolism and to go  
400 beyond glial activation as a marker for brain inflammation as seen by *in vivo* PET, we  
401 investigated changes in immune cell infiltration in mice brains. Leukocytes were extracted  
17

402 from brains and sorted between innate and adaptive immune cells by two individual antibody  
403 panels, making it possible to check for subtypes. Brains of the APPPS1-WD group had less  
404 CD11b<sup>+</sup>Ly6G<sup>+</sup> neutrophils (Fig 6a; WT-ND vs. APPPS1-WD  $p = 0.02$ ; APPPS1-ND vs.  
405 APPPS1-WD  $p = 0.02$ ) than ND brains, no differences could be detected for CD11b<sup>+</sup> myeloid  
406 cells, CD11b<sup>+</sup>F4/80<sup>+</sup> macrophages, and dendritic cells (CD11c<sup>+</sup>MHCII<sup>+</sup> DCs). Similar results  
407 were observed for the WT-WD group (CD11b<sup>+</sup>Ly6G<sup>+</sup> neutrophils: APPPS1-ND vs. WT-WD  $p$   
408  $= 0.05$ ). When investigating T cell infiltration (Fig 6b), the APPPS1-WD group showed a high  
409 proportion of CD3<sup>+</sup> cells, which were elevated compared to WT-ND controls ( $p = 0.04$ ).  
410 Further discrimination between CD8<sup>+</sup> cytotoxic T cells and CD8<sup>-</sup> T cells revealed elevated  
411 CD8<sup>+</sup> T cells in APPPS1-WD brains compared to WT groups (APPPS1-WD vs. WT-ND  
412  $p = 0.01$ ; vs. WT-WD  $p = 0.02$ ). No difference was observed for CD25<sup>+</sup>CD127<sup>-</sup> regulatory T  
413 cells (Tregs). B cell populations did not differ either (Suppl. Fig. 6a). To determine the T cells  
414 possible function in the brain, we next investigated the T cell subtypes. Here, WD-fed  
415 animals had a higher CD8<sup>+</sup> T cell effector memory ( $T_{EM}$ ) phenotype, whereas central memory  
416 ( $T_{CM}$ ) and naive T cell populations did not change (Fig. 6c). Moreover, these groups had a  
417 higher proportion of CD69<sup>+</sup> lymphocytes, indicating activation, compared to WT-ND controls.  
418 In comparison, CD8<sup>+</sup> T cell subpopulations were elevated only in the APPPS1-WD group  
419 (Fig. 6d). Here, a higher percentage of effector memory T cells ( $T_{EM}$ ) compared to the other  
420 groups was detected (Fig. 6d; WT-ND versus APPPS1-WD;  $p = 0.02$ ; APPPS1-ND versus  
421 APPPS1-WD  $p = 0.04$ ; WT-WD versus APPPS1-WD  $p = 0.009$ ) and a trend towards higher  
422 CD69<sup>+</sup>CD44<sup>+</sup> activated effector population compared to the WT groups emerged (Fig 6d,  
423 WT-ND versus APPPS1-WD  $p = 0.05$ ; WT-WD versus APPPS1-WD  $p = 0.04$ ). The immune  
424 checkpoint PD1<sup>+</sup> revealed no differences between any of the groups (Fig 6c, d). While we  
425 detected no pronounced infiltration of innate immune cells, these results indicate that WD  
426 initiated T cell involvement which displayed an effector state.

427 *Immune cell population in white adipose tissue (WAT)*

428 One major hallmark of obesity-induced inflammation is the accumulation and activation of  
429 macrophages in adipose tissue <sup>12</sup>. Therefore, we next investigated changes in T cells and  
430 myeloid cells in WAT by flow cytometry (Fig. 6e and f). T cell populations in WAT between  
431 groups were not different (Fig. 6e). A substantial elevation of macrophage marker F4/80<sup>+</sup> was  
432 detected in both WD-fed groups. Further examination of the pro-inflammatory macrophage  
433 M1 phenotype using CD11c<sup>+</sup> <sup>60</sup> displayed higher populations in WD groups. The ratio of M1  
434 to M2 F4/80<sup>+</sup> macrophages was shifted towards a higher M1 portion in WD-fed animals  
435 (Suppl. Fig. 7). To ensure that we see dendritic cells (DCs) and not M1 macrophages as all  
436 APCs express MHCII and CD11c in WAT, the DC population was additionally gated negative  
437 for F4/80. DC populations were elevated in WD groups, in which WT-WD showed the  
438 greatest differences. Additionally, B cell populations were significantly higher in WAT of  
439 obese compared to lean animals irrespective of their genotype (Suppl. Fig. 6b).

#### 440 *Immunohistochemistry*

441 For all analyzed brains, H&E staining revealed no morphological differences between groups  
442 (Fig. 7a). To clarify possible differences in microglial activation upon diet and validate our *in*  
443 *vivo* results, brains were analyzed for Iba-1, a microglia marker (Fig. 7b). In transgenic  
444 animals, the morphology of microglia changed from a thin and ramified structure of spines to  
445 an activated amoeboid structure, confirming an activated phenotype of microglia with higher  
446 cell numbers in CTX, HIP, and HYP for transgenic animals. No differences were observed  
447 between the diets for the investigated regions, consistent with the observed *in vivo* results.  
448 Iba-1 microglia were highly activated in regions of high plaque load (Suppl. Fig 8 black box),  
449 whereas they were less activated in regions with few to no plaques (Suppl. Fig 8 red box).  
450 Amyloid plaque load in transgenic animals was high, mainly in the CTX and THA, fewer were  
451 identified in the HIP, and only a few animals showed plaques in HYP. In WD-fed groups, we  
452 could not observe that diet increased plaque load in the investigated brain regions CTX, HIP,  
453 and HYP (Fig. 7c). To confirm flow cytometric T cell infiltration in the brain parenchyma, we  
454 stained for infiltrating CD3<sup>+</sup> T cells and found more T cells in AD-WD brains compared to the

455 other groups in CTX as well HIP and HYP (Fig. 7d). Furthermore, for some animals we found  
456 a high number near the choroid plexus, the main entry site of peripheral T cells and B cells  
457 (Suppl. Fig 9), however intragroup variability was high. In wild-type animals, isolated T cells  
458 were observed independent of the diet. Consistent with flow cytometry data, no differences in  
459 B cell counts were detected between the brains of all groups (data not shown).

460

461

## 462 **Discussion**

463 The ageing of the general population in western countries is accompanied by an increase in  
464 the prevalence of dementia, and it is suspected that the increase in overweight and obesity  
465 exacerbate this challenge in public health. The suspected underlying link involves a general  
466 chronic inflammatory state of the patient called metaflammation, but further work is required  
467 to understand the intricacies governing cerebral metabolic disruption and unbalanced diets.  
468 In this work, we investigated such potential interaction first by using non-invasive imaging  
469 techniques to identify molecular and metabolic dysfunctions in different organs *in vivo*. In our  
470 experiments involving wild-type mice and a murine amyloidosis model, a surrogate for AD  
471 progression, mice were fed a western diet upon manifestation of amyloid pathology,  
472 covering the preclinical early to mid-life period when pathophysiological changes can already  
473 be detected<sup>61</sup>. We, therefore, used an amyloidosis mouse model which is well described<sup>43,62</sup>  
474 and represents an un-modifiable AD risk factor. Importantly, our model does not include age-  
475 related effects on the brain and periphery induced by the so-called inflammaging, a  
476 phenomenon proposed to be a low-grade systemic inflammatory process<sup>63</sup> also favoring  
477 age-related diseases like AD<sup>64</sup>. We chose for this study a western diet which is known to  
478 mimic the nutrition of western countries with high fat and high sugar content together with  
479 simple carbohydrates and a shifted fat composition towards saturated fatty acids<sup>65</sup>. This led  
480 to a significant weight gain increase when fed over six months in both, male and female  
481 mice.

482 As the liver is one of the organs heavily affected by a high-caloric diet leading to systemic  
483 disruption and metabolic imbalance, we wanted to monitor the grade of fatty liver syndrome  
484 in WD-fed animals. Via non-invasive proton magnet resonance spectroscopy (<sup>1</sup>H MRS), we  
485 detected markedly elevated lipid levels in the livers of WD-exposed mice. Similar results  
486 could also be detected in the livers of patients already after a 2-week HFD<sup>66</sup>. <sup>1</sup>H MRS  
487 revealed significantly higher lipid mass and fractional lipid mass together with lower levels of  
488 polyunsaturated lipids in WD compared to ND livers, which mirrors the evolution of liver

489 composition in rats fed with high-fat diet<sup>67</sup>. In another study, comparing leptin-deficient ob/ob  
490 mice to controls, a decrease in polyunsaturated lipids and an increase in saturated lipids was  
491 measured in this obesity-only model excluding dietary impact<sup>68</sup>. However, we could not  
492 detect differences in saturated lipids between the diets. Even though some assume a  
493 homogenous hepatic fat distribution<sup>69</sup>, others report heterogeneous hepatic fat distribution  
494 following HFD<sup>70,71</sup>, making it likely that the spectra of the positioned single voxel do not  
495 reflect the whole liver condition. The changes in single hepatic lipid peaks and lipid fractions  
496 after WD endorse the impact of the diet on liver fat accumulation, even after 6 months of WD.  
497 Metabolite analysis of plasma revealed significant differences for pyruvate, 3-  
498 hydroxybutyrate (3-HB), histidine, and isoleucine. 3-Hydroxybutyrate has been shown to  
499 function in rodents as an anti-AD drug<sup>72</sup> and neuroprotective agent<sup>73</sup>. In our study, the levels  
500 are found to be highest in ND-fed transgenic animals, but we found high levels in WD-fed  
501 animals too. Moreover, levels decline in WD-fed APPPS1 animals, which we found to have  
502 brain glucose hypermetabolism. Together with a contradicting study, which showed 3-HB to  
503 be high in 3xTg animals but low in HFD-fed animals and was associated with glucose  
504 metabolism compensation<sup>74</sup>, 3-HB might be an important plasma marker to indicate brain  
505 glucose metabolism changes. Administration of histidine to mice brains has been postulated  
506 to alleviate chronic effects of hypoperfusion by, among other, improving BBB integrity<sup>75</sup>.  
507 Even further, histidine application is associated with a neuroprotective role in AD<sup>76</sup>. Here, the  
508 lower levels only in APPPS1-WD animals might indicate the acceleration of detrimental  
509 processes in this group and in combination with other plasma markers (3-HB, pyruvate)  
510 could be used to specify central metabolic disruptions further.

511

512 In our *in vivo* imaging approach, we investigated diet-induced effects on brain metabolism.  
513 By using glucose and long-chain fatty acid surrogates, we could monitor brain metabolism  
514 alterations induced by diet in wild-types and APPPS1 mice. [<sup>18</sup>F]FDG brain uptake was  
515 higher in WD-fed APPPS1 mice compared to the other conditions, indicating that WD leads  
516 to hypermetabolism in AD transgenic animals. Analysis of the voxel level confirmed a whole-

517 brain effect in APPPS1-WD animals. As studies have already shown a positive correlation  
518 between the [<sup>18</sup>F]FDG and [<sup>18</sup>F]GE-180 signal in aging wild-type mice assuming higher  
519 glucose demand due to higher glial activation<sup>77</sup>, comparison of both tracers revealed in our  
520 study no higher glial-dependent neuroinflammation in APPPS1-WD group compared to the  
521 other groups. This was confirmed by Iba-1 staining in brain tissue. Although obtained using a  
522 different diet and model, these results can be compared to studies done using mice infused  
523 with human A $\beta$ <sub>42</sub> while fed an HFD over three months<sup>78</sup>. The authors could show a [<sup>18</sup>F]FDG  
524 hypermetabolism when diet and A $\beta$  were combined and saw no association between TSPO  
525 signal and glucose uptake, assuming that gliosis is not the only player in diet-induced  
526 neuroinflammation. Longitudinal assessment of [<sup>18</sup>F]FDG brain uptake in the same  
527 transgenic model has been shown to not differ from controls in mid-age, similar to our  
528 results, but decrease with advanced age<sup>79</sup>, assuming that the consumption of a WD can  
529 initiate hypermetabolism in this amyloid model. Interestingly, Ashraf et al. claimed that the  
530 hypermetabolic phase they observed in patients with mild cognitive impairment (MCI) might  
531 reflect a compensatory neuroplastic mechanism of neurons, which, when overstimulated,  
532 could exhaust, thereby accelerating the degenerative process<sup>80</sup>. Thus, the high [<sup>18</sup>F]FDG  
533 uptake that we see in the APPPS1-WD group may represent a transient process of a  
534 neuronal compensatory response that eventually leads to neuronal death and cognitive  
535 decline as a consequence of diet-induced obesity (DIO) and/or dietary components. We  
536 clearly can emphasize a central as well as a systemic disruption in glucose metabolism as  
537 metabolomic analysis revealed elevated pyruvate plasma levels in the WD-fed transgenic  
538 animals complementing the PET results. In addition, metabolomic results revealed a higher  
539 VIP (Variable Importance in Projection) score for glucose; however not significant in the  
540 ANOVA analysis.

541 Many studies could show that direct or indirect (via diet) supplementation of peripheral fatty  
542 acids can activate inflammatory cascades in the brain e.g., via TLRs, and therefore induce  
543 inflammatory processes<sup>81</sup>. We used the long-chain fatty acid tracer [<sup>18</sup>F]FTHA to determine  
544 fatty acid metabolism when continuous delivery of fatty acids is given. Brain uptake revealed

545 indeed a diet-dependent higher fatty acid metabolism, which was independent of the  
546 genotype. In human and pig brains, [<sup>18</sup>F]FTHA has been shown to cross the BBB and to  
547 represent central fatty acid oxidation <sup>82,83</sup>. Moreover, in patients with metabolic syndrome,  
548 [<sup>18</sup>F]FTHA brain uptake was higher, similar to our results. Studies propose that high levels of  
549 saturated FA could lead to the activation of microglia and astrocytes <sup>84,85</sup>, so we compared  
550 [<sup>18</sup>F]GE-180 signals to the [<sup>18</sup>F]FTHA signals with both VOI-based and voxel-wise analysis,  
551 but could not detect overlapping regions. However, no further discrimination between normal  
552 and diseased brains was found in this model using [<sup>18</sup>F]FTHA.

553 Neuroinflammation was assessed by imaging using the TSPO tracer [<sup>18</sup>F]GE-180, which  
554 revealed higher uptake in pathology-rich regions of the transgenic brain, correlating with  
555 results obtained from other studies using other AD models <sup>46,86,87</sup>. In contrast with other  
556 studies showing a higher glial activity after energy-rich diets (for a comprehensive overview  
557 see <sup>15</sup>), we could not demonstrate any diet-dependent variations in this model. It is, however,  
558 also possible that the feeding duration or composition of our WD might not initiate higher glial  
559 inflammation. For instance, in a study that used two high-caloric diets in the same  
560 experimental set-up, only the diet with high lard content (60% fat) led to higher microglial  
561 activation, whereas the WD (40% fat) did not <sup>88</sup>. Furthermore, different durations of HFD  
562 seem to employ region-specific inflammatory processes in the cortex and the cerebellum of  
563 mice <sup>89</sup>.

564 Systemic and central alterations caused by the chronic consumption of a high-caloric diet or  
565 the AD pathology per se might affect tracer uptake into the brain. By determining regional  
566 cerebral blood flow (rCBF) no changes in perfusion were reported for our AD model <sup>90</sup> and in  
567 mice fed an WD for 12 weeks <sup>91</sup>, even after HFD for six months, a lower perfusion was  
568 measured <sup>92</sup>. However, other studies report no increased permeability <sup>89,92</sup>. In DIO rats fed a  
569 WD, an elevated BBB permeability was not observed earlier than 90 days, suggesting a  
570 gradual BBB breakdown <sup>93</sup>. In our study, the western diet might act as an additive factor for  
571 BBB permeability in amyloid-prone animals by disturbing brain metabolic balance. However,  
572 further investigations need to clarify this hypothesis.



573

574 The neuroinflammatory concept is constantly under revision and extensive work in this field  
575 is ongoing <sup>94</sup>, supporting evidence in addition to the initial amyloid cascade hypothesis, that  
576 systemic alterations act as neuroinflammatory drivers by activating inflammatory processes  
577 e.g. by immune cell infiltration and activation. To determine immune cell involvement in the  
578 brain, we examined infiltration of innate immune cells as they have been shown to invade  
579 brains after HFD treatment <sup>37</sup> as well as in AD-prone mice models <sup>40</sup>. Except for lower Ly6G<sup>+</sup>  
580 populations, no higher infiltration of innate immune cells was detected, but we could find a  
581 higher number of CD3<sup>+</sup> cells in the group of APPPS1-WD whose infiltration we validated via  
582 histological staining. Further discrimination into CD3<sup>+</sup>CD8<sup>-</sup> T helper cells and CD3<sup>+</sup>CD8<sup>+</sup>  
583 cytotoxic T cells revealed significantly higher cytotoxic T cells in the WD-fed transgenic  
584 animals compared to the wild-types. In patients of advanced stages of AD, a study could also  
585 find a higher CD3<sup>+</sup> T cell population in brains, which were CD8 positive <sup>95</sup>. We could not  
586 identify T cells near plaques in our model, which is in line with other reports that have shown  
587 T cells to be present in mouse models of AD, but could not see interaction with the plaques  
588 or tau pathology <sup>96,97</sup>. The role T cells play in neurodegenerative disease and which  
589 mechanisms the infiltrating T cells initiate once they reside in the parenchyma is still  
590 discussed. Several studies point towards a neuro-protective role in AD mouse models <sup>42</sup>,  
591 while others report detrimental effects <sup>41</sup>. Further discrimination of T cell subtypes in our  
592 study, could show a polarization towards an effector memory or activated effector phenotype  
593 of both CD8<sup>-</sup> and CD8<sup>+</sup> T cells in the WD group. The chronic metabolic inflammation in  
594 organs like adipose tissue, which display a constant pro-inflammatory burden for the body,  
595 might facilitate activation of naïve T cells in immune compartments of the periphery before  
596 they enter the CNS <sup>98,99</sup>. Whether the T cells were polarized by signals from the periphery or  
597 via CNS internal signals and to which extent they disturb CNS homeostasis and accelerate  
598 inflammatory processes needs to be further clarified.

599 The investigation of the metaflammatory condition in white adipose tissue (WAT) in the  
600 periphery has proven to correspond to studies describing macrophage recruitment and

601 polarization towards pro-inflammatory status in inflamed WAT<sup>100</sup>. Although we found higher  
602 B cell populations in WD-WAT, which contribute to systemic inflammation by modulating T  
603 cells and macrophages<sup>101–103</sup>, no significant changes in T cell populations were detected in  
604 our model. Overall, results clearly show disruption of innate immune cell infiltrates in WAT of  
605 WD-fed animals with minor changes in T cell populations. To our knowledge, we were the  
606 first to compare WAT immune cells of APPPS1 and wild-types, which showed no differences  
607 for both diets. Further experiments to distinguish T cell phenotypes would be helpful to  
608 examine the impact of the WD on the T cells in WAT.

609

610 We are aware that our study includes limitations, which are discussed in the following  
611 paragraph. For the *in vivo* studies, we chose to compare the SUV to correct for the significant  
612 weight changes between diet groups. We chose to not compare SUV ratios due to the lack of  
613 an adequate reference region in our project. Mostly the cerebellum is used as a pseudo-  
614 reference region, but its uptake changed significantly between WT under the control diet and  
615 AD mice under WD for [<sup>18</sup>F]FDG and [<sup>18</sup>F]FTHA. That the cerebellum is affected by the diet  
616 has already been observed in another study<sup>89</sup>. When interpreting [<sup>18</sup>F]FDG results from  
617 different studies, several factors should be considered. The chosen AD models seem to have  
618 a significant impact on the outcome of studies looking at the brain metabolism with a  
619 decreased<sup>79,104</sup>, increased<sup>86,105</sup>, or no different brain [<sup>18</sup>F]FDG uptake<sup>106</sup>. It is important to  
620 note that the TSPO tracer, [<sup>18</sup>F]GE-180 has been the subject of an extensive debate as  
621 several studies have shown that the tracer has only very low to no brain uptake and that this  
622 is only sufficiently high when the BBB is disrupted due to the pathology<sup>107</sup>. Our results show  
623 higher brain uptake of [<sup>18</sup>F]GE-180 in transgenic mice compared to wild-types for the  
624 pathology-rich cortex, which could be related to an altered BBB in WD-fed APPPS1 mice as  
625 discussed previously. Unfortunately, other second generation TSPO tracers have several  
626 problems, such as mixed ligand binding affinity due to gene polymorphism and thus the  
627 development of alternative inflammatory tracers is of enormous importance for future studies  
628 in neurological disorders<sup>108</sup>.

629 In this study, we propose that in AD-prone brains, further mechanisms are triggered by a WD  
630 beyond the classical glial neuroinflammation. Moreover, we encourage further studies to  
631 examine the relation of T cells and brain glucose metabolism in AD, as both were elevated in  
632 the amyloidosis model after the WD.

633

## 634 **Acknowledgements**

635 We thank Phillip Knopf, Vera Jörke, Simon Freisinger, Marta Vuozzo, Laura Kübler, Carsten  
636 Calaminus, Max Zimmermann and Sabrina Buss for their valuable support in this study.  
637 Mathias Jucker and Synovo GmbH for providing the APPPS1-21 transgenic model. Natalie  
638 Hermann, Maren Harant, Linda Schramm, Dennis Haupt, Sandro Aidone and Miriam  
639 Owzcorz for excellent technical support. Barbara Schörg, Dominik Sonanini, Manfred  
640 Kneilling for provision of the flow cytometry T cell antibody panel. Bruker BioSpin GmbH for  
641 the support in the NMR-related part of the study. The FACS Core Facility of the Medical Clinic  
642 in Tuebingen for the support of the flow cytometry measurements. This study was supported  
643 by the Werner Siemens Foundation to B.J.P., and the fortune grant to F.C.M.

## 644 **Contributions:**

645 M.P. wrote the manuscript and performed in vivo imaging, ex vivo flow cytometry and  
646 respective analyses. S.L.H. contributed in in vivo, ex vivo experiments and analyses. G.S.B  
647 & C.T. performed metabolomics and analyses. T.I. wrote the code for the voxel-wise analysis  
648 and performed pre-processing. I.G-M. and L.Q-F. performed histological staining and  
649 analyses. F.C.M. developed the concept. D.S., W.E., G.R., A.M. did radiotracer synthesis  
650 and validation. A.M.S. contributed the <sup>1</sup>H spectroscopy experiments and analyses. B.J.P.  
651 supervised and provided laboratory and equipment. K.H. & N.B. supervised and revised and  
652 edited the manuscript. All authors revised manuscript and all agree with its content.

## 653 **Conflict of Interest:**

654 C.T. and G.S.B. report a research grant by Bruker BioSpin GmbH, Ettlingen, Germany.

655

## 656 Literature

- 657 1. WHO. Obesity and overweight Fact sheets. 2021 [https://www.who.int/news-room/fact-](https://www.who.int/news-room/fact-sheets/detail/obesity-and-overweight)  
658 [sheets/detail/obesity-and-overweight](https://www.who.int/news-room/fact-sheets/detail/obesity-and-overweight).
- 659 2. Whitmer, R. A., Gunderson, E. P., Barrett-Connor, E., Quesenberry, C. P. & Yaffe, K. Obesity  
660 in middle age and future risk of dementia: a 27 year longitudinal population based study. *BMJ*  
661 **330**, (2005).
- 662 3. Hassing, L. B. *et al.* Overweight in midlife and risk of dementia: A 40-year follow-up study. *Int.*  
663 *J. Obes.* **33**, 893–898 (2009).
- 664 4. Hassing, L. B., Dahl, A. K., Pedersen, N. L. & Johansson, B. Overweight in midlife is related to  
665 lower cognitive function 30 years later: A prospective study with longitudinal assessments.  
666 *Dement. Geriatr. Cogn. Disord.* **29**, 543–552 (2010).
- 667 5. Xu, W. L. *et al.* Midlife overweight and obesity increase late-life dementia risk: A population-  
668 based twin study. *Neurology* **76**, 1568–1574 (2011).
- 669 6. Gregor, M. F. & Hotamisligil, G. S. Inflammatory Mechanisms in Obesity. *Annu. Rev. Immunol.*  
670 **29**, 415–445 (2011).
- 671 7. Odegaard, J. I. & Chalwa, A. The immune system as a sensor of the metabolic state. *Immunity*  
672 (2013) doi:doi:10.1016/j.immuni.2013.04.001.
- 673 8. Odegaard, J. I. & Chawla, A. Pleiotropic Actions of Insulin Resistance and Inflammation in  
674 Metabolic Homeostasis. *Science (80-. )*. **339**, 172–177 (2013).
- 675 9. Mighiu, P. I., Filippi, B. M. & Lam, T. K. T. Linking inflammation to the brain-liver axis. *Diabetes*  
676 vol. 61 1350–1352 (2012).
- 677 10. Calay, E. S. & Hotamisligil, G. S. Turning off the inflammatory, but not the metabolic, flames.  
678 *Nat. Med.* **19**, 265–267 (2013).
- 679 11. Christ, A. & Latz, E. The Western lifestyle has lasting effects on metaflammation. *Nat. Rev.*  
680 *Immunol.* **19**, 267–268 (2019).
- 681 12. Weisberg, S. P. *et al.* Obesity is associated with macrophage accumulation in adipose tissue.  
682 *J. Clin. Invest.* **112**, 1796–1808 (2003).
- 683 13. Lumeng, C. N., Bodzin, J. L. & Saltiel, A. R. Obesity induces a phenotypic switch in adipose  
684 tissue macrophage polarization. *J. Clin. Invest.* **117**, 175–184 (2007).
- 685 14. de Sousa Rodrigues, M. E. *et al.* Chronic psychological stress and high-fat high-fructose diet

- 686 disrupt metabolic and inflammatory gene networks in the brain, liver, and gut and promote  
687 behavioral deficits in mice. *Brain. Behav. Immun.* **59**, 158–172 (2017).
- 688 15. Więckowska-Gacek, A., Mietelska-Porowska, A., Wydrych, M. & Wojda, U. Western diet as a  
689 trigger of Alzheimer's disease: From metabolic syndrome and systemic inflammation to  
690 neuroinflammation and neurodegeneration. *Ageing Res. Rev.* **70**, (2021).
- 691 16. Butler, M. J. The role of Western diets and obesity in peripheral immune cell recruitment and  
692 inflammation in the central nervous system. *Brain, Behav. Immun. - Heal.* **16**, 100298 (2021).
- 693 17. De Souza, C. T. *et al.* Consumption of a fat-rich diet activates a proinflammatory response and  
694 induces insulin resistance in the hypothalamus. *Endocrinology* **146**, 4192–4199 (2005).
- 695 18. Graham, L. C. *et al.* Chronic consumption of a western diet induces robust glial activation in  
696 aging mice and in a mouse model of Alzheimer's disease. *Sci. Rep.* **6**, 21568 (2016).
- 697 19. López-Taboada, I., González-Pardo, H. & Conejo, N. M. Western Diet: Implications for Brain  
698 Function and Behavior. *Front. Psychol.* **11**, 1–11 (2020).
- 699 20. Profenno, L. A., Porsteinsson, A. P. & Faraone, S. V. Meta-Analysis of Alzheimer's Disease  
700 Risk with Obesity, Diabetes, and Related Disorders. *Biol. Psychiatry* **67**, 505–512 (2010).
- 701 21. Julien, C. *et al.* High-fat diet aggravates amyloid-beta and tau pathologies in the 3xTg-AD  
702 mouse model. *Neurobiol. Aging* **31**, 1516–1531 (2010).
- 703 22. Sanguinetti, E. *et al.* Combined effect of fatty diet and cognitive decline on brain metabolism,  
704 food intake, body weight, and counteraction by intranasal insulin therapy in 3xtg mice. *Front.*  
705 *Cell. Neurosci.* **13**, (2019).
- 706 23. Oksman, M. *et al.* Impact of different saturated fatty acid, polyunsaturated fatty acid and  
707 cholesterol containing diets on beta-amyloid accumulation in APP/PS1 transgenic mice.  
708 *Neurobiol. Dis.* **23**, 563–572 (2006).
- 709 24. Alex, A., Abbott, K. A., McEvoy, M., Schofield, P. W. & Garg, M. L. Long-chain omega-3  
710 polyunsaturated fatty acids and cognitive decline in non-demented adults: A systematic review  
711 and meta-analysis. *Nutr. Rev.* **78**, 563–578 (2020).
- 712 25. Rapoport, S. I., Rao, J. S. & Igarashi, M. Brain metabolism of nutritionally essential  
713 polyunsaturated fatty acids depends on both the diet and the liver. *Prostaglandins Leukot.*  
714 *Essent. Fat. Acids* **77**, 251–261 (2007).
- 715 26. Snowden, S. G. *et al.* Association between fatty acid metabolism in the brain and Alzheimer  
716 disease neuropathology and cognitive performance: A nontargeted metabolomic study. *PLoS*

- 717 *Med.* **14**, e1002266 (2017).
- 718 27. Beilharz, J. E., Maniam, J. & Morris, M. J. Short-term exposure to a diet high in fat and sugar,  
719 or liquid sugar, selectively impairs hippocampal-dependent memory, with differential impacts  
720 on inflammation. *Behav. Brain Res.* **306**, 1–7 (2016).
- 721 28. Picone, P., Di Carlo, M. & Nuzzo, D. Obesity and Alzheimer's disease: Molecular bases. *Eur. J.*  
722 *Neurosci.* **52**, 3944–3950 (2020).
- 723 29. Guillemot-Legris, O. & Muccioli, G. G. Obesity-Induced Neuroinflammation: Beyond the  
724 Hypothalamus. *Trends Neurosci.* **40**, 237–253 (2017).
- 725 30. Fung, T. C., Olson, C. A. & Hsiao, E. Y. Interactions between the microbiota, immune and  
726 nervous systems in health and disease. *Nat. Neurosci.* **20**, 145–155 (2017).
- 727 31. Heneka, M. T. *et al.* Neuroinflammation in Alzheimer's disease. *The Lancet Neurology* vol. 14  
728 388–405 (2015).
- 729 32. Heneka, M. T., Golenbock, D. T. & Latz, E. Innate immunity in Alzheimer's disease. *Nature*  
730 *Immunology* vol. 16 229–236 (2015).
- 731 33. Cao, W. & Zheng, H. Peripheral immune system in aging and Alzheimer's disease. *Molecular*  
732 *Neurodegeneration* vol. 13 51 (2018).
- 733 34. Galiano-Landeira, J., Torra, A., Vila, M. & Bové, J. CD8 T cell nigral infiltration precedes  
734 synucleinopathy in early stages of Parkinson's disease. *Brain* **143**, 3717–3733 (2020).
- 735 35. Krishnamoorthy, G. *et al.* Myelin-specific T cells also recognize neuronal autoantigen in a  
736 transgenic mouse model of multiple sclerosis. *Nat. Med.* **15**, 626–632 (2009).
- 737 36. Schläger, C. *et al.* Effector T-cell trafficking between the leptomeninges and the cerebrospinal  
738 fluid. *Nature* **530**, 349–353 (2016).
- 739 37. Buckman, L. B. *et al.* Obesity induced by a high-fat diet is associated with increased immune  
740 cell entry into the central nervous system. *Brain. Behav. Immun.* **35**, 33–42 (2014).
- 741 38. Simard, A. R., Soulet, D., Gowing, G., Julien, J. P. & Rivest, S. Bone marrow-derived microglia  
742 play a critical role in restricting senile plaque formation in Alzheimer's disease. *Neuron* **49**,  
743 489–502 (2006).
- 744 39. Butovsky, O., Kunis, G., Koronyo-Hamaoui, M. & Schwartz, M. Selective ablation of bone  
745 marrow-derived dendritic cells increases amyloid plaques in a mouse Alzheimer's disease  
746 model. *Eur. J. Neurosci.* **26**, 413–416 (2007).
- 747 40. Zenaro, E. *et al.* Neutrophils promote Alzheimer's disease-like pathology and cognitive decline

- 748 via LFA-1 integrin. *Nat. Med.* **21**, 880–886 (2015).
- 749 41. Späni, C. *et al.* Reduced  $\beta$ -amyloid pathology in an APP transgenic mouse model of  
750 Alzheimer's disease lacking functional B and T cells. *Acta Neuropathol. Commun.* **3**, 71 (2015).
- 751 42. Marsh, S. E. *et al.* The adaptive immune system restrains Alzheimer's disease pathogenesis by  
752 modulating microglial function. *Proc. Natl. Acad. Sci. U. S. A.* **113**, E1316–E1325 (2016).
- 753 43. Radde, R. *et al.* A $\beta$ 42-driven cerebral amyloidosis in transgenic mice reveals early and robust  
754 pathology. *EMBO Rep.* **7**, 940–946 (2006).
- 755 44. Benavides, J., Fage, D., Carter, C. & Scatton, B. Peripheral type benzodiazepine binding sites  
756 are a sensitive indirect index of neuronal damage. *Brain Res.* **421**, 167–172 (1987).
- 757 45. Chen, M. K. & Guilarte, T. R. Translocator protein 18 kDa (TSPO): Molecular sensor of brain  
758 injury and repair. *Pharmacol. Ther.* **118**, 1–17 (2008).
- 759 46. Liu, B. *et al.* In Vivo Detection of Age- and Disease-Related Increases in Neuroinflammation by  
760 18 F-GE180 TSPO MicroPET Imaging in Wild-Type and Alzheimer's Transgenic Mice. *J.*  
761 *Neurosci.* **35**, 15716–15730 (2015).
- 762 47. Hamacher, K., Coenen, H. H. & Stöcklin, G. Efficient stereospecific synthesis of no-carrier-  
763 added 2-[18F]-fluoro-2-deoxy-D-glucose using aminopolyether supported nucleophilic  
764 substitution. *J. Nucl. Med.* **27**, 235–238 (1986).
- 765 48. Degrado, T. R. Synthesis of 14(R,S)-[18F]Fluoro-6-THIA-Heptadecanoic Acid (FTHA). *J. Label.*  
766 *Compd. Radiopharm.* **XXIX**, 990–995 (1991).
- 767 49. Wickstrøm, T. *et al.* The development of an automated and GMP compliant FASTlab™  
768 Synthesis of [18F]GE-180; A radiotracer for imaging translocator protein (TSPO). *J. Label.*  
769 *Compd. Radiopharm.* **57**, 42–48 (2014).
- 770 50. Ma, Y. *et al.* A three-dimensional digital atlas database of the adult C57BL/6J mouse brain by  
771 magnetic resonance microscopy. *Neuroscience* **135**, 1203–1215 (2005).
- 772 51. Mirrione, M. M. *et al.* A novel approach for imaging brain-behavior relationships in mice reveals  
773 unexpected metabolic patterns during seizures in the absence of tissue plasminogen activator.  
774 *Neuroimage* **38**, 34–42 (2007).
- 775 52. Rorden, C. & Brett, M. Stereotaxic display of brain lesions. *Behav. Neurol.* **12**, 191–200 (2000).
- 776 53. Provencher, S. W. Estimation of metabolite concentrations from localized in vivo proton NMR  
777 spectra. *Magn. Reson. Med.* **30**, 672–679 (1993).
- 778 54. Ye, Q., Danzer, C. F., Fuchs, A., Wolfrum, C. & Rudin, M. Hepatic lipid composition differs



- 779 between ob/ob and ob/+ control mice as determined by using in vivo localized proton magnetic  
780 resonance spectroscopy. *Magn. Reson. Mater. Physics, Biol. Med.* **25**, 381–389 (2012).
- 781 55. Ye, Q. *et al.* Longitudinal evaluation of hepatic lipid deposition and composition in ob/ob and  
782 ob/+ control mice. *NMR Biomed.* **26**, 1079–1088 (2013).
- 783 56. Hoffmann, S. H. L. *et al.* Visualization and quantification of in vivo homing kinetics of myeloid-  
784 derived suppressor cells in primary and metastatic cancer. *Theranostics* **9**, 5869–5885 (2019).
- 785 57. Eggers, L. F. & Schwudke, D. Lipid Extraction: Basics of the Methyl-tert-Butyl Ether Extraction.  
786 in *Encyclopedia of Lipidomics* (ed. Wenk, M. R.) (Dordrecht: Springer Netherlands), 2016).  
787 doi:10.1007/978-94-007-7864-1\_96-1.
- 788 58. Peng, X. G. *et al.* Quantification of liver fat in mice: Comparing dual-echo Dixon imaging,  
789 chemical shift imaging, and <sup>1</sup>H-MR spectroscopy. *J. Lipid Res.* **52**, 1847–1855 (2011).
- 790 59. Dieterle, F., Ross, A. & Senn, H. Probabilistic Quotient Normalization as Robust method to  
791 account for dilution of complex biological mixtures. *Anal. chem.* **78**, 4281–4290 (2006).
- 792 60. Patsouris, D. *et al.* Ablation of CD11c-Positive Cells Normalizes Insulin Sensitivity in Obese  
793 Insulin Resistant Animals. *Cell Metab.* **8**, 301–309 (2008).
- 794 61. Selkoe, D., Mandelkow, E. & Holtzman, D. Deciphering alzheimer disease. *Cold Spring Harb.*  
795 *Perspect. Med.* **2**, a011460 (2012).
- 796 62. Gengler, S., Hamilton, A. & Hölscher, C. Synaptic Plasticity in the Hippocampus of a APP/PS1  
797 Mouse Model of Alzheimer's Disease Is Impaired in Old but Not Young Mice. *PLoS One* **5**, 1–  
798 10 (2010).
- 799 63. Franceschi, C. *et al.* Inflamm-aging. An evolutionary perspective on immunosenescence. *Ann.*  
800 *N. Y. Acad. Sci.* **908**, 244–254 (2000).
- 801 64. Deleidi, M., Jäggle, M. & Rubino, G. Immune ageing, dysmetabolism and inflammation in  
802 neurological diseases. *Front. Neurosci.* **9**, 1–14 (2015).
- 803 65. Cordain, L. *et al.* Origins and evolution of the Western diet: health implications for the 21st  
804 century. *American Journal of Clinical Nutrition* (2005) doi:10.1093/ajcn/82.2.483.
- 805 66. Westerbacka, J. *et al.* Dietary fat content modifies liver fat in overweight nondiabetic subjects.  
806 *J. Clin. Endocrinol. Metab.* **90**, 2804–2809 (2005).
- 807 67. Yaligar, J. *et al.* Evaluation of dietary effects on hepatic lipids in high fat and placebo diet fed  
808 rats by in vivo MRS and LC-MS techniques. *PLoS One* **9**, (2014).
- 809 68. Ye, Q., Danzer, C. F., Fuchs, A., Wolfrum, C. & Rudin, M. Hepatic lipid composition differs

- 810 between ob/ob and ob/+ control mice as determined by using in vivo localized proton magnetic  
811 resonance spectroscopy. *Magn. Reson. Mater. Physics, Biol. Med.* **25**, 381–389 (2012).
- 812 69. Machann, J. *et al.* Hepatic lipid accumulation in healthy subjects: A comparative study using  
813 spectral fat-selective MRI and volume-localized 1H-MR spectroscopy. *Magn. Reson. Med.* **55**,  
814 913–917 (2006).
- 815 70. Décarie, P.-O. *et al.* Fatty liver deposition and sparing: a pictorial review. *Insights Imaging* **2**,  
816 533–538 (2011).
- 817 71. Keramida, G., Hunter, J., Dizdarevic, S. & Peters, A. M. Heterogeneity of intrahepatic fat  
818 distribution determined by 18F-FDG PET and CT. *Ann. Nucl. Med.* **30**, 200–206 (2016).
- 819 72. Krishnan, M. *et al.*  $\beta$ -hydroxybutyrate Impedes the Progression of Alzheimer's Disease and  
820 Atherosclerosis in ApoE- Deficient Mice. *Nutrients* **12**, 1–13 (2020).
- 821 73. Kashiwaya, Y. *et al.* D- $\beta$ -hydroxybutyrate protects neurons in models of Alzheimer's and  
822 Parkinson's disease. *Proc. Natl. Acad. Sci. U. S. A.* **97**, 5440–5444 (2000).
- 823 74. Sanguinetti, E. *et al.* Microbiome-metabolome signatures in mice genetically prone to develop  
824 dementia, fed a normal or fatty diet. *Sci. Rep.* **8**, 1–13 (2018).
- 825 75. Song, J. *et al.* Histidine alleviates impairments induced by chronic cerebral hypoperfusion in  
826 mice. *Front. Physiol.* **9**, 1–8 (2018).
- 827 76. Herculano, B. *et al.*  $\beta$ -Alanyl-L-histidine rescues cognitive deficits caused by feeding a high fat  
828 diet in a transgenic mouse model of Alzheimer's disease. *J. Alzheimer's Dis.* **33**, 983–997  
829 (2013).
- 830 77. Brendel, M. *et al.* Time courses of cortical glucose metabolism and microglial activity across  
831 the life span of wild-type mice: A PET study. *J. Nucl. Med.* **58**, 1984–1990 (2017).
- 832 78. Barron, A. M. *et al.* Assessment of neuroinflammation in a mouse model of obesity and  $\beta$ -  
833 amyloidosis using PET. *J. Neuroinflammation* **13**, 221 (2016).
- 834 79. Takkinen, J. S. *et al.* Brain energy metabolism and neuroinflammation in ageing APP/PS1-21  
835 mice using longitudinal 18F-FDG and 18F-DPA-714 PET imaging. *J. Cereb. Blood Flow Metab.*  
836 **37**, 2870–2882 (2017).
- 837 80. Ashraf, A., Fan, Z., Brooks, D. J. & Edison, P. Cortical hypermetabolism in MCI subjects: a  
838 compensatory mechanism? *Eur. J. Nucl. Med. Mol. Imaging* **42**, 447–458 (2015).
- 839 81. Milanski, M. *et al.* Saturated fatty acids produce an inflammatory response predominantly  
840 through the activation of TLR4 signaling in hypothalamus: Implications for the pathogenesis of

- 841 obesity. *J. Neurosci.* **29**, 359–370 (2009).
- 842 82. Guiducci, L. *et al.* Biodistribution of the fatty acid analogue 18F-FTHA: Plasma and tissue  
843 partitioning between lipid pools during fasting and hyperinsulinemia. *J. Nucl. Med.* **48**, 455–462  
844 (2007).
- 845 83. Karmi, A. *et al.* Increased brain fatty acid uptake in metabolic syndrome. *Diabetes* **59**, 2171–  
846 2177 (2010).
- 847 84. Wang, Z. *et al.* Saturated fatty acids activate microglia via Toll-like receptor 4 / NF- $\kappa$ B  
848 signalling. *Br. J. Nutr.* **107**, 229–241 (2012).
- 849 85. Gupta, S., Knight, A. G., Gupta, S., Keller, J. N. & Bruce-Keller, A. J. Saturated long-chain fatty  
850 acids activate inflammatory signaling in astrocytes. *J. Neurochem.* **120**, 1060–1071 (2012).
- 851 86. Brendel, M. *et al.* Glial activation and glucose metabolism in a transgenic amyloid mouse  
852 model: A triple-tracer PET study. *J. Nucl. Med.* **57**, 954–960 (2016).
- 853 87. López-Picón, F. R. *et al.* Neuroinflammation Appears Early on PET Imaging and Then Plateaus  
854 in a Mouse Model of Alzheimer Disease. *J. Nucl. Med.* **59**, 509–515 (2018).
- 855 88. Pistell, P. J. *et al.* Cognitive impairment following high fat diet consumption is associated with  
856 brain inflammation. *J. Neuroimmunol.* **219**, 25–32 (2010).
- 857 89. Guillemot-Legrís, O. *et al.* High-fat diet feeding differentially affects the development of  
858 inflammation in the central nervous system. *J. Neuroinflammation* **13**, 1–11 (2016).
- 859 90. Maier, F. C. *et al.* Longitudinal PET-MRI reveals  $\beta$  2-amyloid deposition and rCBF dynamics  
860 and connects vascular amyloidosis to quantitative loss of perfusion. *Nat. Med.* **20**, 1485–1492  
861 (2014).
- 862 91. Rutkowsky, J. M. *et al.* Reduced cognitive function , increased blood- brain-barrier transport  
863 and inflammatory responses , and altered brain metabolites in LDLr - / -and C57BL / 6 mice fed  
864 a western diet. *PLoS One* **13**, 1–38 (2018).
- 865 92. Choi, Y. S. *et al.* Hyperpolarized [1-<sup>13</sup>C] pyruvate MR spectroscopy detect altered glycolysis in  
866 the brain of a cognitively impaired mouse model fed high-fat diet 11 Medical and Health  
867 Sciences 1109 Neurosciences 11 Medical and Health Sciences 1103 Clinical Sciences. *Mol.*  
868 *Brain* **11**, 1–12 (2018).
- 869 93. Hargrave, S. L., Davidson, T. L., Zheng, W. & Kinzig, K. P. Western Diets Induce Blood-Brain  
870 Barrier Leakage and Alter Spatial Strategier in Rats. *Behav. Neurosci.* **130**, 123–135 (2016).
- 871 94. Selkoe, D. J. & Hardy, J. The amyloid hypothesis of Alzheimer's disease at 25 years. *EMBO*

- 872 *Mol. Med.* **8**, 595–608 (2016).
- 873 95. Merlini, M., Kirabali, T., Kulic, L., Nitsch, R. M. & Ferretti, M. T. Extravascular CD3+ T Cells in  
874 Brains of Alzheimer Disease Patients Correlate with Tau but Not with Amyloid Pathology: An  
875 Immunohistochemical Study. *Neurodegener. Dis.* **18**, 49–56 (2018).
- 876 96. Ferretti, M. T. *et al.* T-cell brain infiltration and immature antigen-presenting cells in transgenic  
877 models of Alzheimer's disease-like cerebral amyloidosis. *Brain. Behav. Immun.* **54**, 211–225  
878 (2016).
- 879 97. Laurent, C. *et al.* Hippocampal T cell infiltration promotes neuroinflammation and cognitive  
880 decline in a mouse model of tauopathy. *Brain* **140**, 184–200 (2017).
- 881 98. Korn, T. & Kallies, A. T cell responses in the central nervous system. *Nature Reviews*  
882 *Immunology* vol. 17 179–194 (2017).
- 883 99. Nishimura, S. *et al.* CD8+ effector T cells contribute to macrophage recruitment and adipose  
884 tissue inflammation in obesity. *Nat. Med.* **15**, 914–920 (2009).
- 885 100. Weisberg, S. P. *et al.* Obesity is associated with macrophage accumulation in adipose tissue.  
886 *J. Clin. Invest.* **112**, 1796–1808 (2003).
- 887 101. Duffaut, C., Galitzky, J., Lafontan, M. & Bouloumié, A. Unexpected trafficking of immune cells  
888 within the adipose tissue during the onset of obesity. *Biochem. Biophys. Res. Commun.* **384**,  
889 482–485 (2009).
- 890 102. Winer, D. A. *et al.* B cells promote insulin resistance through modulation of T cells and  
891 production of pathogenic IgG antibodies. *Nat. Med.* **17**, 610–617 (2011).
- 892 103. Figueiredo, P. S. *et al.* Fatty acids consumption: The role metabolic aspects involved in obesity  
893 and its associated disorders. *Nutrients* vol. 9 (2017).
- 894 104. Waldron, A. M. *et al.* In vivo molecular neuroimaging of glucose utilization and its association  
895 with fibrillar amyloid- $\beta$  load in aged APPPS1-21 mice. *Alzheimer's Res. Ther.* **7**, 76 (2015).
- 896 105. Poisnel, G. *et al.* Increased regional cerebral glucose uptake in an APP/PS1 model of  
897 Alzheimer's disease. *Neurobiol. Aging* **33**, 1995–2005 (2012).
- 898 106. Kuntner, C. *et al.* Limitations of small animal PET imaging with [18F]FDDNP and FDG for  
899 quantitative studies in a transgenic mouse model of alzheimer's disease. *Mol. Imaging Biol.* **11**,  
900 236–240 (2009).
- 901 107. Zanotti-Fregonara, P. *et al.* Anatomy of 18F-GE180, a failed radioligand for the TSPO protein.  
902 *Eur. J. Nucl. Med. Mol. Imaging* **47**, 2233–2236 (2020).

- 903 108. Cumming, P. *et al.* Sifting through the surfeit of neuroinflammation tracers. *J. Cereb. Blood*  
904 *Flow Metab.* **38**, 204–224 (2018).  
905

Figure 1

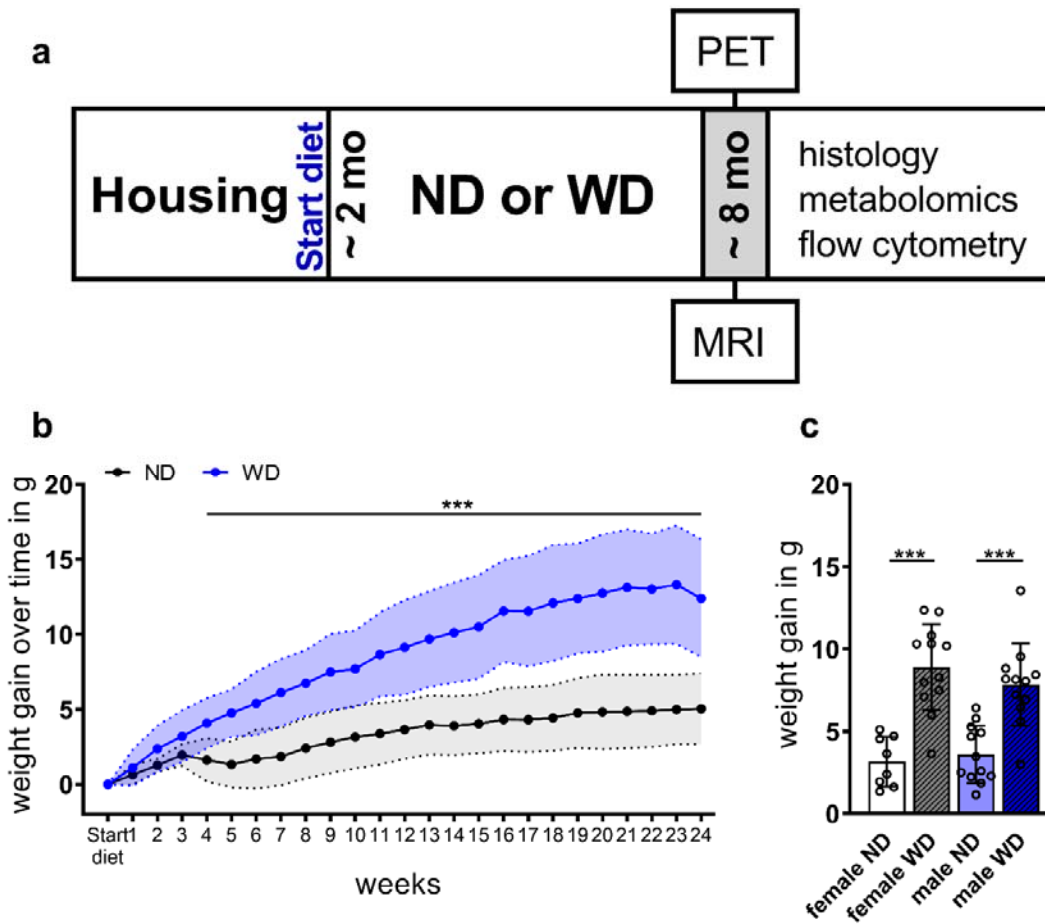

**Figure 1: Study design and weight**

(a) General study design of in vivo and ex vivo experiments. Western diet (WD) or the normal diet (ND) feeding period started at 2 months age continued over 24 weeks. At ~ 8 months, imaging (PET, MRI), flow cytometry, metabolomics, and histology were performed. (b) Mean weight gain  $\pm$  SD between ND-fed (black) and WD-fed (blue) animals over the period of 24 weeks starting on the day of the diet change. (c) Mean weight gain between females and males fed an ND (blank white, blue) or WD (striped grey, blue). \*\*\*  $p < 0.001$ . ND = normal diet; WD = western diet; WD (n=24, male=12, female=12), ND (n=20, male=12, female=8).

Figure 2

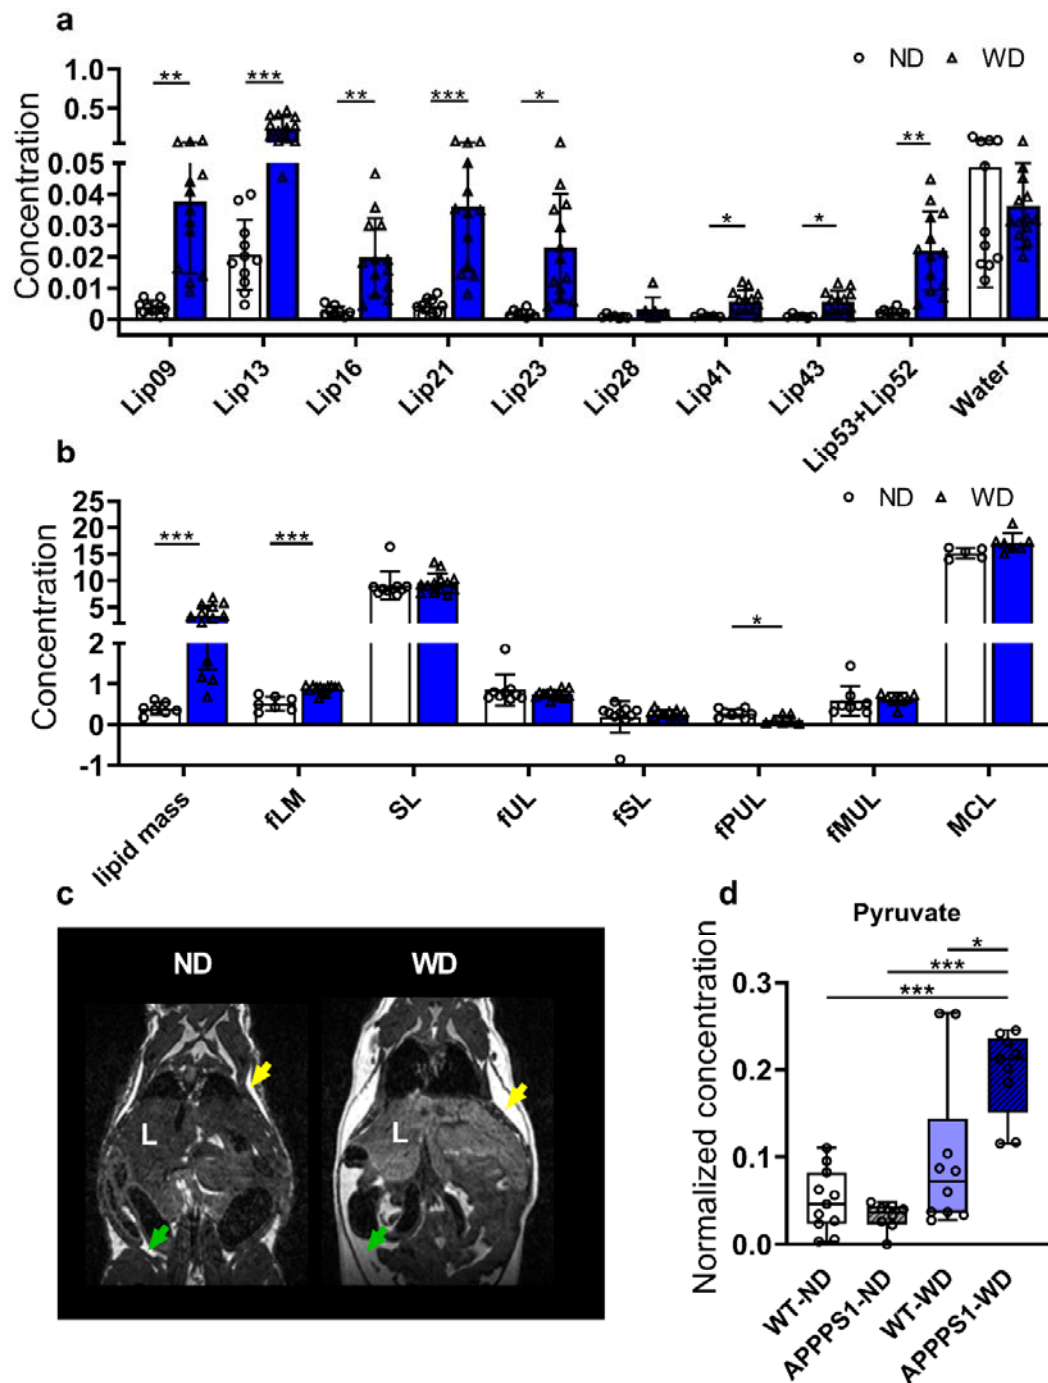

**Figure 2: MR-based lipid analysis and metabolomics**

$^1\text{H}$  MRS of hepatic lipid composition and metabolomic results between ND and WD fed animals. (a) single lipids are depicted according to their chemical shift, indicating changes between ND (white,

circles)- and WD-fed animals (blue, triangles). (b) Calculated lipid compositions using the single lipid peaks. (c) Exemplary contrast-normalized T2-weighted images illustrating fat depots in ND- and WD-fed mice. Subcutaneous fat marked with yellow arrows; abdominal fat marked with green arrows. (d) Box plot of pyruvate changes between the four mice groups. <sup>1</sup>H MRS results were analyzed using multiple unpaired t-test with post-hoc multiple comparison correction using Holm-Sidak method (p value threshold set to  $\alpha = 0.05$ ).

fLM = fractional lipid mass; SL = saturated lipid component; fUL = fraction of unsaturated lipids; fSL = fraction of saturated lipids; fPUL = fraction of polyunsaturated lipids; fMUL = fraction of monounsaturated lipids; L = liver; Statistical significance: \*p < 0.05, \*\*p < 0.01, \*\*\*p < 0.001.



Figure 3

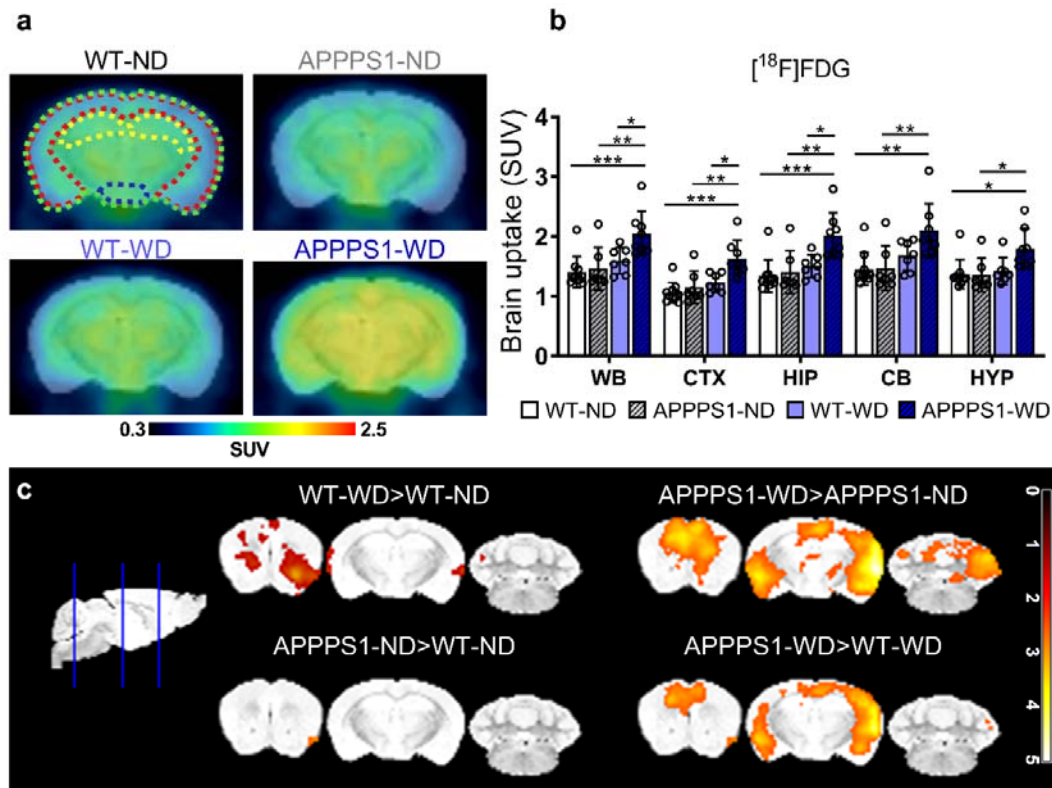

**Figure 3: [<sup>18</sup>F]FDG-PET imaging.**

(a) Comparison of axial brain images of [<sup>18</sup>F]FDG uptake in all four groups indicate a higher uptake in APPPS1-WD mice. Regions are indicated as follows: green = WB; red = CTX; yellow = HIP; blue = HYP. (b) mean SUV (30-60 min *p.i.*) in WB, CTX, HIP, CB, and HYP between all groups. (c) T-maps comparing SUVs are shown with threshold  $p < 0.01$ .

WT-ND  $n = 10$ , APPPS1-ND  $n = 7$ , WT-WD  $n = 7$ , APPPS1-WD  $n = 8$ . \* $p < 0.05$ , \*\* $p < 0.01$ , \*\*\* $p < 0.001$ , post hoc Tukey corrected for multiple comparisons; WB = whole brain; CTX = cortex; HIP = hippocampus; CB = cerebellum; HYP = hypothalamus.

Figure 4

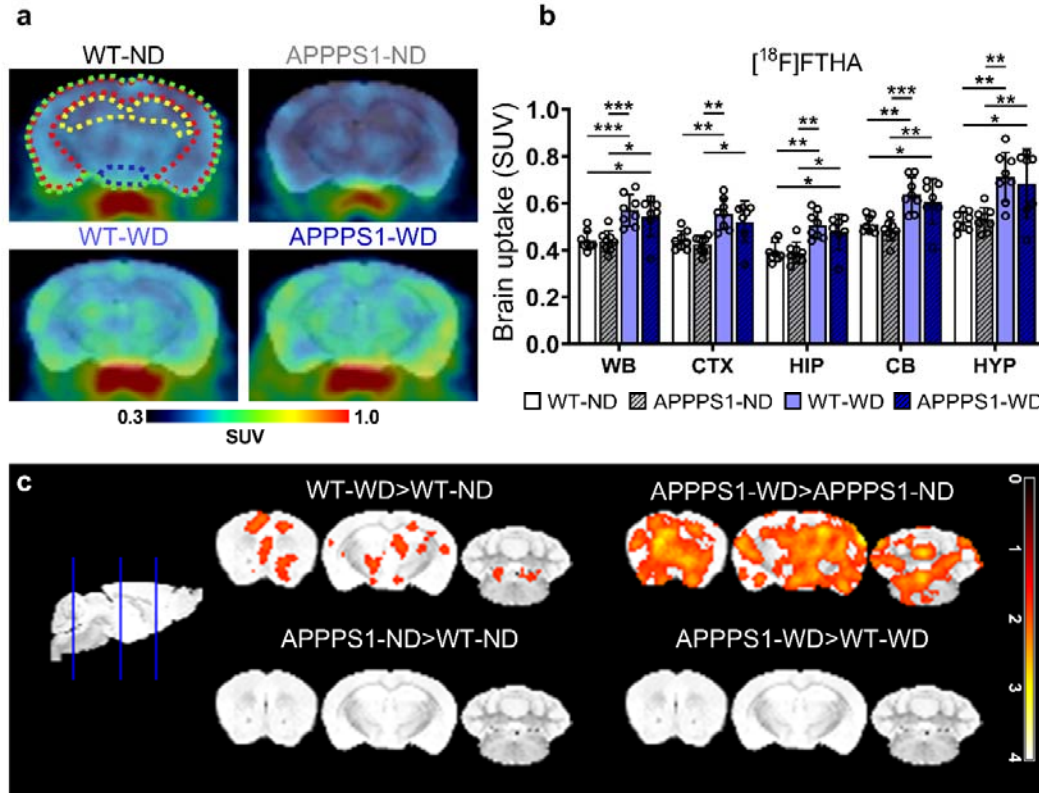

**Figure 4: [<sup>18</sup>F]FTHA-PET imaging.**

(a) Exemplary axial brain images of [<sup>18</sup>F]FTHA uptake display higher uptake in WD-fed mice irrespective of genotype. Regions are indicated as follows: green = WB; red = CTX; yellow = HIP; blue = HYP. (b) Mean SUVs (30-60 min *p.i.*) in WB, CTX, HIP, CB and HYP for [<sup>18</sup>F]FTHA. (c) Comparison of voxel-wise analysis. The threshold was set to  $p < 0.05$ .

WT-ND  $n = 8$ , APPPS1-ND  $n = 8$ , WT-WD  $n = 8$ , APPPS1-WD  $n = 7$ . \* $p < 0.05$ , \*\* $p < 0.01$ , \*\*\* $p < 0.001$ , post hoc Tukey corrected for multiple comparisons; WB = whole brain; CTX = cortex; HIP = hippocampus; CB = cerebellum; HYP = hypothalamus.

Figure 5

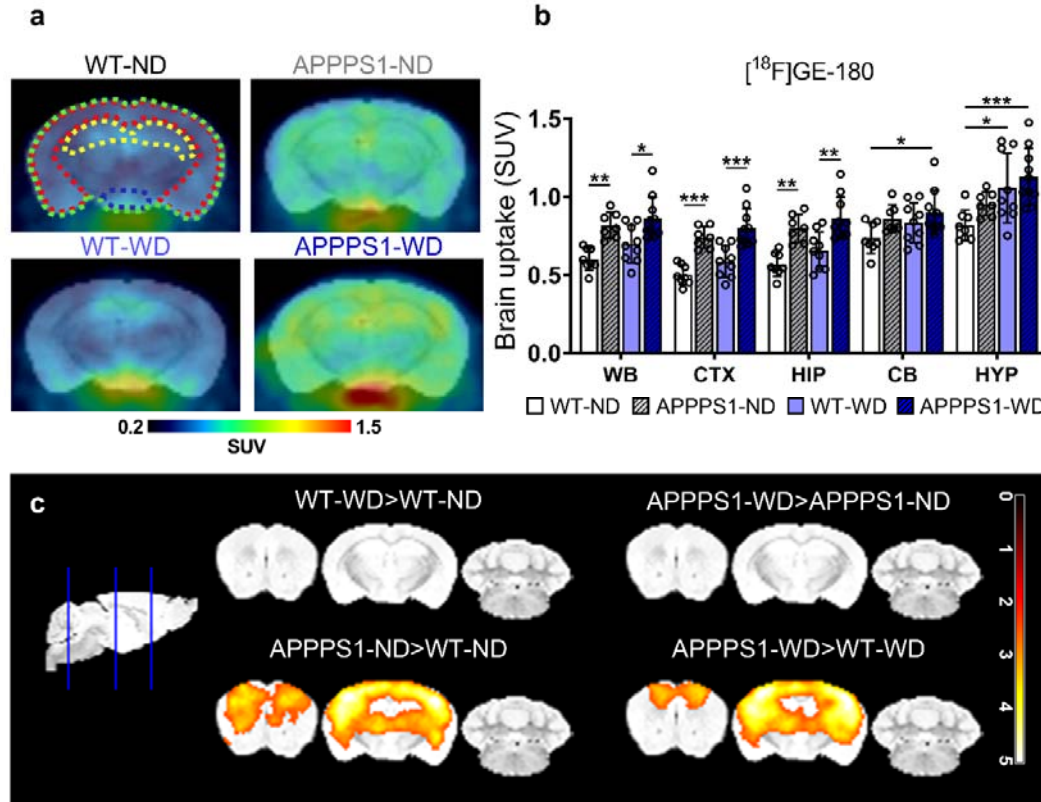

**Figure 5: [<sup>18</sup>F]GE-180-PET imaging.**

(a) Higher uptake of [<sup>18</sup>F]GE-180 in APPPS1 mice compared to WT shown in representative axial brain images. Colored outlines illustrate the analyzed brain regions green = WB; red = CTX; yellow = HIP; blue = HYP. (b) Mean SUVs (30-60 min *p.i.*) in WB, CTX, HIP, CB, and HYP for [<sup>18</sup>F]GE-180 in all groups. (c) Representative images of voxel-wise analyzed SUVs are shown with threshold  $p < 0.01$ . WT-ND  $n = 8$ , APPPS1-ND  $n = 7$ , WT-WD  $n = 9$ , APPPS1-WD  $n = 10$ . \* $p < 0.05$ , \*\* $p < 0.01$ , \*\*\* $p < 0.001$ ; WB = whole brain; CTX = cortex; HIP = hippocampus; CB = cerebellum; HYP = hypothalamus.

Figure 6

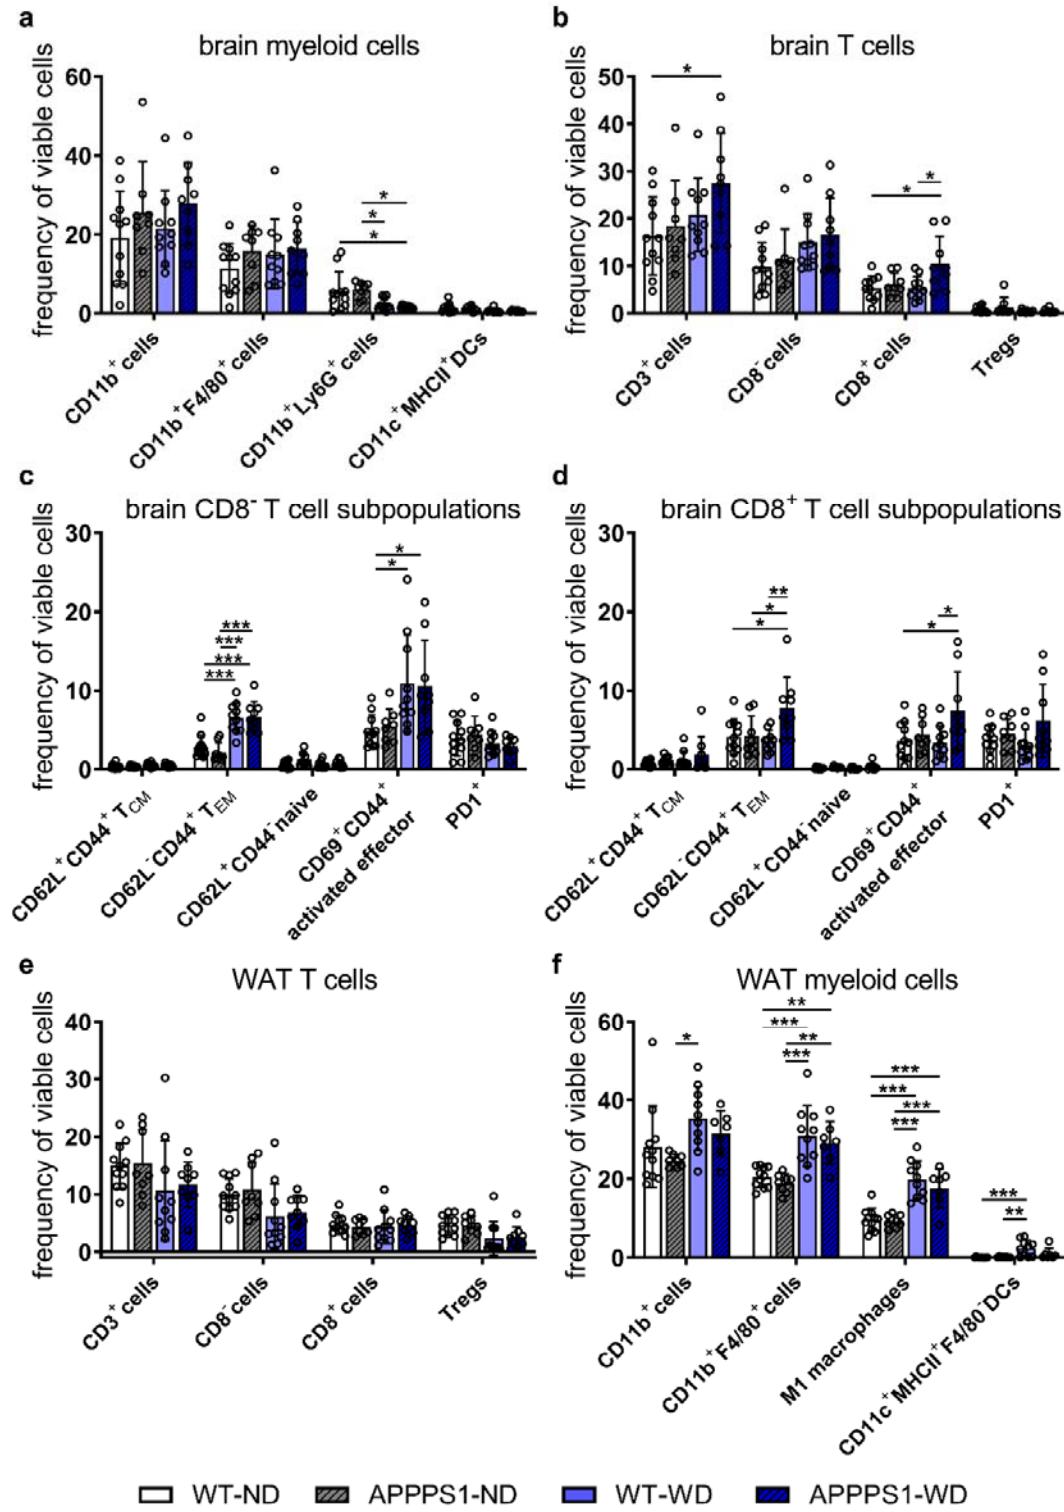

**Figure 6: Immune cell analysis.**

Brain and WAT immune cell population displayed as the frequency of viable cells. (a) Brain myeloid cells show only minor changes. (b) CD3<sup>+</sup> T cells and CD8<sup>+</sup> T cells are significantly higher in APPPS1-WD mice compared to non-treated WT animals. (c) CD8<sup>+</sup> T cell subpopulations reveal higher effector memory T cells (T<sub>EM</sub>) and higher activated effector T cells in WD groups. (d) CD8<sup>+</sup> T cell populations show higher effector memory and activated effector T cell phenotype, but only in APPPS1-WD animals. (e) WAT myeloid cell population display significantly higher CD11b<sup>+</sup>F4/80<sup>+</sup> macrophages, inflammatory M1 macrophages (CD11b<sup>+</sup>F4/80<sup>+</sup>CD11c<sup>+</sup>) and CD11c<sup>+</sup>MHCII<sup>+</sup> DCs in WD-fed groups. (f) T cell populations in WAT reveal no differences between groups.

Results in mean ± SD; \*p<0.05, \*\*p<0.01, \*\*\*p<0.001, post hoc Tukey corrected for multiple comparisons; Brain (A-D): WT-ND n = 11, APPPS1-ND n = 8, WT-WD n = 10, APPPS1-WD n = 9. WAT (E-F): WT-ND n = 11, APPPS1-ND n = 8, WT-WD n = 10, APPPS1-WD n = 7. \*p<0.05, \*\*p<0.01, \*\*\*p<0.001. DC = dendritic cells; T<sub>CM</sub> = central memory T cells; T<sub>EM</sub> = effector memory T cells; Tregs = regulatory T cells.



Figure 7:

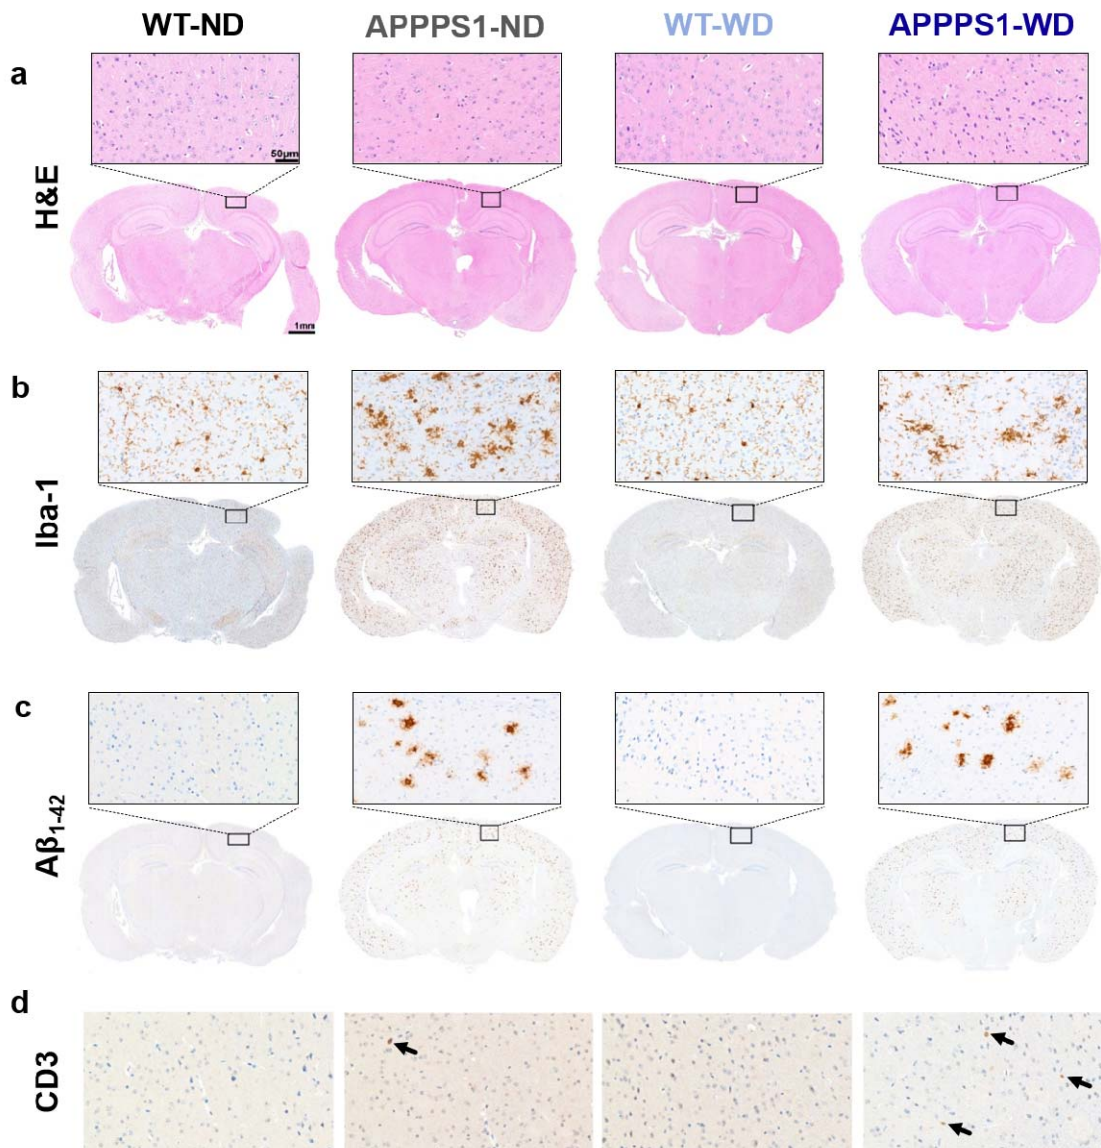

**Figure 7: Histological analysis.**

Histological staining results are depicted in representative images per group per staining (Scale bar 1 mm). Magnifications are depicted for similar cortical areas (Scale bar 50 μm). (a) H&E does not show any anatomical differences between groups. (b) Microglia staining using Iba-1 as marker shows a ramified/resting phenotype in WT brains, whereas activated amoeboid phenotype of microglia in transgenic AD animals was observed, together with a higher number of positive cells. No differences between ND and WD groups were observed. (c) Amyloid plaques stained specifically with Aβ<sub>1-42</sub> antibody were visible in APPPS1 animals in CTX, HIP, and HYP. WT animals were devoid of specific staining. (d) CD3<sup>+</sup> staining revealed more T cells in cortical, hippocampal, and hypothalamic regions of

APPPS1-WD animals compared to WT animals (black arrows). CTX = cortex; HIP = hippocampus;

HYP = hypothalamus. WT-ND n = 2; APPPS1-ND n = 3; WT-WD n = 3; APPPS1-WD n = 3.
